1 **BrainPalmSeq: A curated RNA-seq database of palmitoylating and de-palmitoylating enzyme**  
2 **expression in the mouse brain**

3

4 **Authors:** Wild, AR<sup>1</sup>; Hogg, PW<sup>1</sup>; Flibotte, S<sup>2</sup>; Nasser, G<sup>1</sup>; Hollman, R<sup>1</sup>; Haas, K<sup>1</sup> and Bamji, SX<sup>1</sup>

5

6

7

8 **Affiliations:**

9 1 Department of Cellular and Physiological Sciences, Life Sciences Institute and Djavad Mowafaghian  
10 Centre for Brain Health, University of British Columbia

11 2 Life Sciences Institute Bioinformatics Facility, University of British Columbia

12

13

14

15

16

17

18

19

20

21 Correspondence:

22 Shernaz Bamji, Ph.D.

23 Department of Cellular and Physiological Sciences

24 Life Sciences Institute,

25 Djavad Mowafaghian Centre for Brain Health

26 University of British Columbia

27 2350 Health Sciences Mall

28 Vancouver, B.C., V6T 1Z3

29 Off: 604-822-4746

## 30 **Abstract**

31 Protein S-palmitoylation is a reversible post-translational lipid modification that plays a critical  
32 role in neuronal development and plasticity, while dysregulated S-palmitoylation underlies a number of  
33 severe neurological disorders. Dynamic S-palmitoylation is regulated by a large family of ZDHHC  
34 palmitoylating enzymes, their accessory proteins, and a small number of known de-palmitoylating  
35 enzymes. Here, we curated and analyzed expression data for the proteins that mediate S-palmitoylation  
36 from publicly available RNAseq datasets, providing a comprehensive overview of their distribution in the  
37 mouse nervous system. We developed a web-tool that enables interactive visualization of the expression  
38 patterns for these proteins in the nervous system (<http://brainpalmseq.med.ubc.ca/>), and explored this  
39 resource to find region and cell-type specific expression patterns that give insight into the function of  
40 palmitoylating and de-palmitoylating enzymes in the brain and neurological disorders. We found  
41 coordinated expression of ZDHHC enzymes with their accessory proteins, de-palmitoylating enzymes and  
42 other brain-expressed genes that included an enrichment of S-palmitoylation substrates. Finally, we  
43 utilized ZDHHC expression patterns to predict and validate palmitoylating enzyme-substrate interactions.

## 44 **Introduction**

45 Protein S-palmitoylation is a post-translational lipid modification that mediates dynamic changes  
46 in protein stability, function, and membrane localization. S-palmitoylation is defined as the reversible  
47 formation of a cysteine residue thioester bond with the fatty acid palmitate, and is the most prevalent  
48 post-translational lipid modification in the brain. Dynamic changes in S-palmitoylation are critical for  
49 neuronal development and synaptic plasticity (Fukata et al., 2013; Fukata and Fukata, 2010; Globa and  
50 Bamji, 2017; Matt et al., 2019), oligodendrocyte differentiation and myelination (Ma et al., 2021;  
51 Schneider et al., 2005), and astrocyte proliferation (Yuan et al., 2021). Furthermore, numerous  
52 neurological and psychiatric diseases have now been attributed to mutations in the genes encoding  
53 palmitoylating and de-palmitoylating enzymes, including schizophrenia, intellectual disability and CLN1  
54 disease (Mukai et al., 2004; Nita et al., 2016; Raymond et al., 2007), underscoring the importance of  
55 proper regulation of S-palmitoylation for normal brain function.

56 S-Palmitoylation is mediated by a family of ZDHHC enzymes that share a consensus 'Asp-His-His-  
57 Cys' catalytic domain. These enzymes are structurally heterogeneous multi-pass transmembrane proteins  
58 that localize to a variety of intracellular compartments, including the Golgi apparatus, endoplasmic  
59 reticulum (ER), recycling endosomes and the plasma membrane (Globa and Bamji, 2017). The ZDHHC  
60 enzymes are known to associate with accessory proteins that regulate their stability, activity, and  
61 trafficking (Salaun et al., 2020). Several de-palmitoylating enzymes have also been identified that act as

62 the ‘erasers’ of *S*-palmitoylation, and are divided into three classes: the acyl-protein thioesterases that  
63 shuttle between the Golgi and cytosol (APTs; Vartak et al., 2014), the predominantly lysosomal palmitoyl-  
64 protein thioesterases (PPTs; Koster and Yoshii, 2019) and the more recently discovered  $\alpha/\beta$  hydrolase  
65 domain-containing 17 proteins (ABHD17; Lin and Conibear, 2015). Unlike other post-translational  
66 modifications, palmitoylation lacks a consensus substrate amino sequence, and the mechanisms that  
67 govern ZDHHC enzyme-substrate interactions are controversial, with contrasting reports of substrate  
68 interactions being both promiscuous and specific (Malgapo and Linder, 2021). Currently these interactions  
69 are thought to be governed by the subcellular targeting of ZDHHCs enzymes and the presence of protein-  
70 protein interacting motifs within the ZDHHC N- and C-termini, which are highly diverse among the ZDHHC  
71 enzymes (Rana et al., 2018). Differential gene expression can also have a profound influence on protein  
72 interactions and may play a role in the coordination of *S*-palmitoylation in the brain. However, a detailed  
73 overview and analysis of the precise cellular and regional expression patterns of the palmitoylating and  
74 de-palmitoylating enzymes has not yet been described, and as such, little is known about how this  
75 expression is coordinated in the nervous system.

76         Recent advances in single-cell RNA sequencing (scRNAseq) techniques have enabled the  
77 classification of neuronal and non-neuronal cell types in unprecedented detail, providing a better  
78 understanding of cellular diversity and function in the nervous system, while also providing a means to  
79 study the expression patterns of individual genes across an ever-expanding range of brain regions and  
80 cellular classifications. Here, we capitalized on the recent surge in RNAseq publications characterizing  
81 regional and cellular transcriptomics of the mouse nervous system. We curated and analyzed expression  
82 data from a number of publicly available RNAseq mouse datasets to generate a detailed analysis of the  
83 expression patterns of the genes associated with *S*-palmitoylation in the mouse brain. Furthermore, we  
84 present an interactive web tool that allows user-driven interrogation of the expression patterns of  
85 palmitoylating and de-palmitoylating enzymes from numerous collated studies across a variety of brain  
86 regions and cell types (<http://brainpalmseq.med.ubc.ca/>). We demonstrate the utility of this resource by  
87 detailing the considerable cell type and regional heterogeneity in expression patterns of these enzyme  
88 families and their accessory proteins, revealing numerous cell type enrichments and co-expression  
89 patterns that allowed us to generate and test hypotheses about palmitoylating enzyme-substrate  
90 interactions.

## 91 Results

### 92 **BrainPalmSeq: an interactive database to search palmitoylating and depalmitoylating enzyme** 93 **expression in the mouse brain**

94 The recent development of scRNAseq has revolutionized our understanding of the complex  
95 transcriptional diversity of neuronal and non-neuronal cell types in the brain. We found however, there  
96 were several barriers to the easy access for much of this data, with no single resource available to evaluate  
97 multi-study expression data. Data can also be difficult to access when studies are not accompanied by an  
98 interactive online web viewer, while datasets that do have a web viewer employ diverse interfaces that  
99 are often complex, particularly for large scRNAseq datasets. Furthermore, the differing study specific  
100 analysis pipelines, as well as the variety of data presentation formats in web viewers including heatmaps,  
101 bar charts, tables or t-SNE plots can make datasets difficult for non-bioinformaticians to interpret and  
102 compare. In order to remove these barriers and provide easy access to expression data for the proteins  
103 that regulate S-palmitoylation in the brain, we created 'BrainPalmSeq', an easy-to-use web platform  
104 allowing user driven interrogation of compiled multi-study expression data at cellular resolution through  
105 simple interactive heatmaps that are populated according to user selected brain regions, cell-types or  
106 genes of interest (<http://brainpalmseq.med.ubc.ca/>).

107 To create BrainPalmSeq we first curated three large datasets from whole-brain scRNAseq studies  
108 that were acquired through selection-free cell sampling to provide high resolution expression data  
109 covering hundreds of cell types at a variety of developmental ages (Rosenberg et al., 2018; Saunders et  
110 al., 2018; Zeisel et al., 2018). As scRNAseq has several caveats including low sensitivity and high frequency  
111 of dropout events leading to incomplete detection of expressed genes (Haque et al., 2017), we  
112 complemented these datasets where possible with curation of several bulk and pooled-cell RNAseq  
113 studies that used population-level ensemble measurements from whole-brain and region-specific studies.  
114 We further included selected studies for the major glial cell types and data from the most comprehensive  
115 neuron specific study performed to date by the Allen Institute (Supplementary File 1). Together, the  
116 datasets curated in BrainPalmSeq cover all major regions of the mouse nervous system across a variety of  
117 regional and cellular resolutions.

118 Expression data were extracted from selected studies for the 24 mouse ZDHHC genes (*Zdhhc1-*  
119 *Zdhhc25*, while *Zdhhc10* is omitted), as well as the best characterized de-palmitoylating enzymes (*Ppt1*,  
120 *Lypla1*, *Lypla2*, *Abhd17a*, *Abhd17b* and *Abhd17c*) and ZDHHC accessory proteins (*Golga7*, *Golga7b* and  
121 *Selk*). Where possible, data were processed from the raw transcripts or unique molecular identifier (UMI)

122 counts using the same normalization protocol to allow for more consistent evaluation of differences in  
123 gene expression within datasets. We sampled from RNAseq datasets that used a diverse range of sample  
124 collection, processing and analysis techniques, allowing for direct visualization of the relative expression  
125 patterns of selected genes can be directly visualized within datasets. Users can then validate their  
126 observations across complimentary whole brain or region/cell-type specific datasets included in  
127 BrainPalmSeq. Dropdown menus allow for selection of individual ZDHHC genes or brain regions within  
128 each dataset, while the hover tool reveals metadata for each cell type, including neurotransmitter  
129 designations and marker genes. We provide download links to all expression data including cell type  
130 metadata so that users can replot gene expression profiles in their preferred format. To demonstrate the  
131 utility of this resource, we performed a detailed exploration of selected datasets from BrainPalmSeq,  
132 revealing how expression patterns can give insights into the function of the palmitoylating and de-  
133 palmitoylating enzymes in the mouse brain.

#### 134 **ZDHHC expression in the nervous system shows regional and cell-type specific patterning**

135 We began by exploring BrainPalmSeq data curated from the ‘MouseBrain’ dataset, which provides  
136 the broadest overview of expression patterns in the nervous system (Zeisel et al., 2018). This scRNAseq  
137 study sampled multiple dissected regions from the adolescent (mean age ~P25) mouse central and  
138 peripheral nervous systems (CNS and PNS, respectively), identifying 265 transcriptomically unique cell-  
139 types (referred to herein as metacells) for which we plotted re-normalized ZDHHC expression values,  
140 according to the hierarchical cell-type clustering established by the original study (Figure 1A). While  
141 ZDHHC expression was detected in all regions of the nervous system, expression of the 24 ZDHHC genes  
142 was highly variable across metacell types and clusters. We measured the mean ZDHHC expression within  
143 each cluster to gain insight into which cell-types in the nervous system have the greatest overall  
144 expression of palmitoylating enzymes. The heatmap rows and columns were ranked (sorted by  
145 descending averages) to determine which cell-types had the highest expression of ZDHHCs, and which  
146 ZDHHCs were most abundantly expressed across cell-types (Figure 1B). Mean ZDHHC expression was  
147 particularly high in neurons of the PNS, along with cholinergic/monoaminergic and hindbrain neurons of  
148 the CNS. Of the non-neuronal metacell clusters, oligodendrocytes had the highest ZDHHC expression,  
149 while other glial cell-types appear at the lower end of the ranking (Figure 1B). *Zdhhc20* was the most  
150 abundantly expressed ZDHHC, with the highest mean expression across all cell-type clusters, followed by  
151 *Zdhhc2*, *Zdhhc17*, *Zdhhc3* and *Zdhhc21*, while expression of *Zdhhc11*, *Zdhhc19* and *Zdhhc25* were  
152 negligible. We next clustered neuronal metacells of the PNS and CNS according to the neurotransmitter  
153 expression combinations, revealing the highest mean ZDHHC expression was observed in neurons that

154 utilized acetylcholine and nitric oxide as co-neurotransmitters, with cholinergic neurons featuring near  
155 the top of the list in several neurotransmitter combinations (Figure 1C). Monoaminergic neurons utilizing  
156 noradrenaline and serotonin also generally ranked high in the list, consistent with the data in Figure 1B  
157 that ranked cholinergic and monoaminergic neurons as the metacell cluster with the highest CNS ZDHHC  
158 expression overall, indicating a higher propensity for these cell-types to utilize S-palmitoylation as a post-  
159 translational mechanism to modify cellular signaling. We performed comparative analysis of ZDHHC  
160 expression on another large-scale scRNAseq study of the mouse brain that sampled a variety of cortical  
161 and subcortical structures of the adult mouse (P60-P70) (Saunders et al., 2018; ‘DropViz’; Figure 1-figure  
162 supplement 1A). We found expression patterns and enrichments to be similar across these two  
163 independent, large scale scRNAseq studies, supporting the general trends observed within the  
164 MouseBrain dataset.

165 To gain insight into the potential networks of ZDHHC enzymes that might work together to coordinate  
166 S-palmitoylation in different cell types we performed co-expression analysis (Spearman correlation)  
167 between ZDHHC genes across all 265 metacell types in the MouseBrain dataset (Figure 1D). Neuron  
168 enriched *Zdhhc3*, *Zdhhc8*, *Zdhhc17* and *Zdhhc21* formed the strongest network of co-expression  
169 associations, while glial cell enriched *Zdhhc2*, *Zdhhc9* and *Zdhhc20* formed less robust correlations with  
170 other ZDHHCs. Weaker correlations were observed across the 565 cell-types in the DropViz dataset, which  
171 may reflect the absence of the PNS neurons and glia in this study (Figure 1-figure supplement 1D).

172 In order to create a list of potential substrates for the ZDHHCs in the mouse nervous system, we  
173 expanded our co-expression analysis to include all expressed genes from the ‘MouseBrain’ dataset that  
174 had significant correlation ( $R > 0.7$ ) with one or more ZDHHC. We identified 914 genes with expression  
175 patterns that were significantly correlated with ZDHHCs. This list was cross-referenced with the mouse  
176 SwissPalm database of S-palmitoylated substrates identified in at least one palmitoyl-proteome or  
177 experimentally validated (SwissPalm annotated; Blanc et al., 2015, 2019). We found that genes that  
178 showed correlated expression with a ZDHHC were significantly enriched with S-palmitoylation substrates,  
179 indicating that ZDHHCs are more likely to be co-expressed with their S-palmitoylation substrates in the  
180 brain (Figure 1E). Co-expression analysis of the ‘DropViz’ dataset revealed a similar enrichment of S-  
181 palmitoylation substrates that were co-expressed with ZDHHCs (Figure 1-figure supplement 1E),  
182 supporting the notion of ZDHHC enzyme-substrate co-expression. PANTHER GO analysis of the ZDHHC co-  
183 expressed S-palmitoylation substrates curated from ‘MouseBrain’ revealed several significant  
184 enrichments in GO terms for biological processes related to protein localization (Figure 1F). These findings

185 are consistent with the known role of S-palmitoylation in regulating protein localization and signaling  
186 complexes at cellular membranes.

### 187 **Heterogeneity in ZDHHC expression within excitatory neurons of the dorsal hippocampus**

188 The hippocampus is a heavily studied brain region that is critical for learning and memory (Bird  
189 and Burgess, 2008). A recent pooled-cell RNAseq study of excitatory neurons in the hippocampus revealed  
190 extensive regional variability in gene expression profiles of the hippocampal tri-synaptic loop  
191 ([hipposeq.janelia.org](http://hipposeq.janelia.org); Cembrowski et al., 2016). In order to clearly visualize if ZDHHC expression also  
192 varied within these different cell populations, we projected log transformed expression heatmaps  
193 generated in BrainPalmSeq for the ‘hipposeq’ dorsal-ventral excitatory neuron dataset on to anatomical  
194 maps of the dorsal hippocampus (Figure 2A). We observed considerable heterogeneity in the regional  
195 expression patterns of the ZDHHCs in the hippocampus. Hierarchical clustering analysis revealed that the  
196 ZDHHCs could be grouped into those that showed similar expression in all regions, those that were  
197 dentate gyrus granule cell (DG) enriched, DG depleted or CA1/CA2 enriched (Figure 2B). We generated  
198 comparative heatmaps for several scRNAseq studies curated in BrainPalmSeq that also quantified the  
199 hippocampal excitatory neuron transcriptome and found similar cross-study expression patterns for many  
200 of the ZDHHCs (Figure 2-figure supplement 1A). Furthermore, *in situ* hybridization data from the Allen  
201 Institute showed a high degree of overlap with the ‘hipposeq’ derived ZDHHC expression patterns,  
202 supporting the replicability of the expression patterns observed in the ‘hipposeq’ dataset (Figure 2-figure  
203 supplement 1B; Supplementary File 2).

204 We next sought to utilize the ‘hipposeq’ dataset to determine if there might be regional  
205 differences in the expression of S-palmitoylation substrates in excitatory neurons of the dorsal  
206 hippocampus, which may be potential substrates for regionally enriched ZDHHC enzymes. To investigate  
207 the regionally enriched predicted hippocampal palmitoylome, we utilized the enrichment analysis tools  
208 built in to [hipposeq.janelia.org](http://hipposeq.janelia.org) (see Materials and Methods). Neurons in each hippocampal sub-region  
209 expressed unique S-palmitoylation substrates that were related to highly divergent functions. We found  
210 for CA1 neurons, which have the highest expression of *Zdhhc2*, *Zdhhc17*, *Zdhhc23* and *Zdhhc9* (Figure 2C),  
211 the CA1 enriched predicted palmitoylome (Figure 2D) generated KEGG pathways related to ‘Calcium  
212 signaling’, ‘Glutamatergic synapse’ and ‘Long term potentiation’, supporting the known role for S-  
213 palmitoylation in CA1 hippocampal synaptic plasticity (Figure 2E; Ji and Skup, 2021; Matt et al., 2019). The  
214 CA1 predicted palmitoylome was composed of around 46 % synaptic proteins (SynGO annotated), with  
215 SynGO ontologies related to ‘synaptic vesicle exocytosis’ and ‘synapse organization’ (Figure 2F; Koopmans

216 et al., 2019). In contrast, the predicted palmitoylome of DG granule cells which have the highest  
217 expression of *Zdhhc21*, *Zdhhc4*, *Zdhhc24* and *Zdhhc8* (Figure 2G, H) generated KEGG pathways related to  
218 'Ribosome', 'Cholinergic synapse' and 'Parkinson's disease' (Figure 2I). The DG predicted-palmitoylome  
219 was composed of 29 % synaptic proteins (SynGO annotated), with SynGO ontologies related to 'protein  
220 translation at presynapse' and 'protein translation at postsynapse', revealing a potential role for  
221 palmitoylating enzymes in regulating translation in this cell-type that has not yet been studied (Figure 2J).  
222 Together, we have described patterns of restricted expression of ZDHHC enzymes and S-palmitoylation  
223 substrates in the dorsal mouse hippocampus, and generated regionally-enriched predicted-  
224 palmitoylomes that provide insight into the role of S-palmitoylation in neuronal function in each of these  
225 hippocampal sub-regions.

### 226 **Neocortical ZDHHC expression is partially segregated across cortical layers and neuronal subclasses**

227 We next examined scRNAseq datasets curated in BrainPalmSeq from the cortex, beginning with a  
228 study of the primary somatosensory cortex (SSp; Zeisel et al., 2015). We projected heatmaps of pyramidal  
229 excitatory neuron ZDHHC expression generated in BrainPalmSeq onto cortical layer diagrams of SSp, again  
230 revealing anatomically heterogeneous excitatory neuron expression patterns for several of the ZDHHC  
231 transcripts. Clustering primarily grouped the enzymes according to expression levels, with *Zdhhc21*,  
232 *Zdhhc17* and *Zdhhc8* displaying the highest relative expression (Figure 3B). *Zdhhc2*, *Zdhhc3* and *Zdhhc20*  
233 expression was also high, with the remainder of the ZDHHCs having moderate to low expression. We  
234 compared these expression patterns with other datasets curated in BrainPalmSeq (Figure 3-figure  
235 supplement 1A), which revealed many consistent patterns of expression maintained across several  
236 independent studies. For example, multiple studies reported high expression of *Zdhhc8* in cortical Layer  
237 2/3, enrichment of *Zdhhc2* in Layer 4 and elevated expression of *Zdhhc21* in all layers, particularly in Layer  
238 5. *Zdhhc3* and *Zdhhc20* were also broadly expressed in all cortical layers across studies. Similar patterns  
239 were seen in the SSp region from available in situ hybridization studies from Allen Brain Institute (Figure  
240 3-figure supplement 1B).

241 We examined expression patterns of the ZDHHC enzymes from one of the largest neuronal  
242 scRNAseq studies from the isocortex performed by the Allen Brain Institute, which identified 236  
243 glutamatergic and 117 GABAergic distinct neuron metacell types (Yao et al., 2021). We averaged ZDHHC  
244 expression data downloaded from BrainPalmSeq for the major metacell clusters from all regions of the  
245 isocortex, according to their anatomical location and/or axon projection and plotted ranked heatmaps  
246 (Figure 3C,D). We again found that *Zdhhc20* was the ZDHHC transcript with the highest expression, with



247 broad expression across the majority of glutamatergic and GABAergic cell-types. Elevated expression of  
248 *Zdhhc14* was found in both glutamatergic and GABAergic neurons, which was moderately expressed in  
249 other studies of the brain and cortex discussed previously. Numerous subtypes of projection neurons  
250 featured at the top of the ranking including pyramidal tract (PT) projecting neurons found in layer 5 of the  
251 cortex, that have extensive dendritic branching and long-range axonal projections to the spinal cord,  
252 brainstem and midbrain, as well as the ipsilateral cortex, striatum and thalamus. Other neuron subtypes  
253 with high ZDHHC expression included a number of intratelencephalic (IT) projecting neuron classes,  
254 including those from Layer 4/5 of the temporal/perirhinal/entorhinal cortices, Car3 expressing  
255 Layer 6 neurons, Layer 6b neurons, and Cortex IT projecting neurons from all cortical layers (Harris and  
256 Shepherd, 2015; Yao et al., 2021). GABAergic neurons of the isocortex also showed elevated expression  
257 of the common neuronal ZDHHCs including *Zdhhc2*, *Zdhhc3*, *Zdhhc14*, *Zdhhc17*, *Zdhhc20* and *Zdhhc21*.  
258 The highest mean ranked expression was observed in the recently categorized Sncg neurons that  
259 correspond to *Vip*<sup>+</sup>/*Cck*<sup>+</sup> multipolar or basket cells (Tasic et al., 2018), and lowest expression was observed  
260 in the *Vip* subclass of interneurons.

261 Together, our observations reveal that the complex transcriptional diversity of neurons that has  
262 recently been revealed by RNA sequencing also includes heterogeneity in the expression of the ZDHHC  
263 enzymes that mediate palmitoylation. These expression patterns are likely to influence enzyme-substrate  
264 interactions along with the function of S-palmitoylation substrates, and thus influence neuronal  
265 development, function and synaptic plasticity.

### 266 **De-palmitoylating enzyme and ZDHHC accessory protein expression in the nervous system shows** 267 **regional and cell-type specific patterning**

268 Dynamic turnover of protein S-palmitoylation is mediated by the activity of de-palmitoylating  
269 enzymes, which determine the half-life of S-palmitoylation on a target protein. These include acyl-protein  
270 thioesterases 1 and 2 (APT1, APT2; encoded by *Lypla1*, *Lypla2*), palmitoyl-protein thioesterase 1 (PPT1)  
271 and the more recently identified  $\alpha/\beta$  hydrolase domain-containing 17 proteins (ABHD17A, ABHD17B and  
272 ABHD17C). Compared with the ZDHHC enzymes, relatively less is known about the substrates, sub-cellular  
273 localization and brain expression patterns of this family of enzymes. We next explored BrainPalmSeq to  
274 determine which cell-types/brain regions show the highest expression of de-palmitoylating enzymes.

275 We first examined expression heatmaps for the known de-palmitoylating enzymes across the 265  
276 cell-types identified in the 'MouseBrain' dataset (Figure 4A) and the cell-type averages for the 565 cell-  
277 types from the 'DropViz' dataset (Figure 4-figure supplement 1A). *Ppt1* and *Abhd17a* were the enzymes

278 with the broadest expression across all cell-types, with *Ppt1* expression being notably elevated in neurons  
279 of the hindbrain and immune cells, and *Abhd17a* being elevated in hindbrain neurons, sensory neurons,  
280 oligodendrocytes and epithelial cells. Ranked expression (sorted by descending averages) of de-  
281 palmitoylating enzymes in the 'MouseBrain' (Figure 4B) and 'DropViz' (Figure 4-figure supplement 1B)  
282 datasets classified oligodendrocyte lineage cells among the cell-types with the highest expression of de-  
283 palmitoylating enzymes overall, primarily due to elevated expression of *Abhd17b*. This mirrors  
284 oligodendrocyte enrichment of ZDHHC enzyme expression, again indicating that dynamic regulation of S-  
285 palmitoylation may be particularly important in this cell type. *Lypla2* expression was greater than *Lypla1*  
286 overall in the brain, with *Lypla2* expression being highest in neurons and ependymal cells (Figure 4-figure  
287 supplement 1A). *Abhd17c* had the lowest brain expression of all the de-palmitoylating enzymes studied.  
288 Correlation analysis between the ZDHHCs and de-palmitoylating enzymes revealed numerous instances  
289 of co-expression with almost every ZDHHC (Figure 4D), revealing potential cooperative pairs of  
290 palmitoylating and de-palmitoylating enzymes in the nervous system.

291         Although the ZDHHC enzymes are thought to act autonomously, several accessory proteins have  
292 been discovered that can regulate ZDHHC stability, localization and catalytic activity (Salaun et al., 2020).  
293 These include GOLGA7 (GCP16), which can bind to ZDHHC9 and enhance both protein stability and  
294 enzymatic activity by stabilizing the ZDHHC9 auto-palmitoylated intermediate that is formed prior to  
295 palmitate transfer from the enzyme to the substrate protein (Mitchell et al., 2014; Swarthout et al., 2005).  
296 Both GOLGA7 and related isoform GOLGA7B are also able to interact with ZDHHC5, with the latter  
297 influencing ZDHHC5 plasma membrane localization (Woodley and Collins, 2019). Finally, SELK (SELENOK;  
298 Selenoprotein K) is an ER localized protein that was found to interact with ZDHHC6, stabilize the auto-  
299 palmitoylated intermediate and increase palmitoylation of substrate proteins including the IP<sub>3</sub> receptor  
300 (Fredericks et al., 2017, 2014). We observed widespread expression of *Selk* across all cell-types, with  
301 expression being considerably higher than any of the ZDHHCs, de-palmitoylating enzymes or other  
302 accessory proteins (Figure 4A, S4A). This is consistent with the known functions of SELK in the ER  
303 associated protein degradation pathway and regulation of ER calcium flux (Pitts and Hoffmann, 2018).  
304 *Golga7b* expression was widespread across neuronal subtypes but barely detected in glial cells (Figure 4A,  
305 S4A). Accordingly, *Golga7b* expression was also strongly correlated with several of the ZDHHCs that were  
306 most highly expressed in neurons, including *Zdhhc3*, *Zdhhc8*, *Zdhhc17* and *Zdhhc21* (Figure 4D). In  
307 contrast, *Golga7* was enriched in glial cells, particularly in oligodendrocytes, similar to ZDHHC9 for which  
308 GOLGA7 is a key accessory protein (Figure 4A, S4A). GOLGA7 and GOLGA7B share 61% amino acid

309 similarity, but their expression was either not correlated or was negatively correlated, indicating that the  
310 ZDHC association of each of these proteins may be regulated in part by differential expression.

### 311 **Loss of function mutations in palmitoylating and de-palmitoylating enzymes**

312 Impaired regulation of S-palmitoylation has been implicated in numerous neurological disorders,  
313 many of which are due to loss of function (LOF) mutations in the genes encoding palmitoylating and de-  
314 palmitoylating enzymes (Cho and Park, 2016; Matt et al., 2019). We next sought to determine if the  
315 regional and cell type expression data available in BrainPalmSeq could reveal insights into the  
316 pathogenesis of disorders caused by LOF mutations in palmitoylating and de-palmitoylating enzymes. As  
317 many of these diseases have a neurodevelopmental origin, we examined whole brain datasets curated in  
318 BrainPalmSeq from the neonatal (Rosenberg et al., 2018), adolescent (Zeisel et al., 2018) and adult  
319 (Sjöstedt et al., 2020) mouse brain.

320 A single nucleotide polymorphism (SNP) in the *ZDHC8* gene has been implicated in increased  
321 susceptibility to schizophrenia (Chen et al., 2004; Mukai et al., 2004), while hemizygous microdeletion in  
322 the chromosomal locus 22q11, which encodes a number of genes including *ZDHC8*, is one of the highest  
323 known genetic risk factors to developing schizophrenia (Figure 5A; Karayiorgou et al., 2010). To assess the  
324 developmental expression of *Zdhhc8*, we averaged expression within broadly defined cell-type clusters  
325 that could be applied to both the Rosenberg and Zeisel scRNAseq datasets (Figure 5A, B; Supplementary  
326 File 3). *Zdhhc8* expression was highest in neurons of the cortex and hippocampus, followed by neurons of  
327 the mid- and hindbrain at both developmental ages. To explore regional expression in the adult mouse  
328 brain, we projected BrainPalmSeq generated heatmaps expression data from the ‘Protein Atlas’ mouse  
329 whole brain dataset (bulk RNAseq from major brain regions; Figure 5-figure supplement 1) onto  
330 anatomical maps of the mouse brain, again revealing highest expression of *Zdhhc8* in the cortex, followed  
331 by the hippocampus and basal ganglia (Figure 5C; Sjöstedt et al., 2020). *Zdhhc8* expression was particularly  
332 enriched in Layer 2/3 of the neonatal (not shown) and adult mouse (Figure S3B) cortex, which is the  
333 cortical layer with the most pronounced morphological deficits in patients with Schizophrenia (Glantz and  
334 Lewis, 2000; Kolluri et al., 2005; Wagstyl et al., 2016). Together, we found *Zdhhc8* expression patterns in  
335 the mouse brain that are established early in postnatal development and maintained into adulthood, that  
336 also overlay with many brain regions and cell types that are known to be severely affected in patients with  
337 schizophrenia. These observations support a model in which LOF *ZDHC8* mutations may elicit many of  
338 the symptoms of schizophrenia by disrupting S-palmitoylation and normal neuronal development in these  
339 brain regions.

340 Mutations in the *ZDHHC9* gene, which is located on the X chromosome, have been identified in  
341 ~2% of individuals with X-linked intellectual disability (ID) (Raymond et al., 2007; Tzschach et al., 2015).  
342 Neuroanatomical abnormalities reported in patients with *ZDHHC9* mutations include decreased cortical,  
343 thalamic and striatal volume, as well as widespread white matter abnormalities with prominent  
344 hypoplasia (under-development) of the corpus callosum (Baker et al., 2015; Bathelt et al., 2016).  
345 Disrupted white matter integrity is thought to underlie deficits in global and local brain connectivity in  
346 patients with *ZDHHC9* mutations (Bathelt et al., 2017). *Zdhhc9* knock-out mice also develop similar  
347 pathological changes, including decreased volume of the corpus callosum (Kouskou et al., 2018). We  
348 observed considerable cell-type enrichment of *Zdhhc9* in oligodendrocytes across studies and  
349 developmental ages (Figure 5D, E), accompanied by moderate neuronal expression of *Zdhhc9* relative to  
350 other ZDHHCs across several brain regions including the hippocampus and cortex (Figure 2A, 3A, 5D, E),  
351 consistent with the known function of ZDHHC9 in regulating neuronal development (Shimell et al., 2019).  
352 Regionally, we found *Zdhhc9* expression in adult mice to be highly enriched in the corpus callosum, the  
353 largest white matter tract in the brain (Figure 5F). As myelin production by oligodendrocytes is critical for  
354 maintaining white matter integrity, these observations indicate that disrupting S-palmitoylation in  
355 oligodendrocytes may underlie the white matter pathology and decreased connectivity observed in  
356 patients with X-linked ID and *ZDHHC9* mutations.

357 Infantile neuronal ceroid lipofuscinosis (INCL or CLN1 disease) is a severe neurological disorder  
358 caused by LOF mutations in the *PPT1* gene that presents in the first 6 - 12 months of life and is  
359 characterized by rapid developmental regression, blindness and seizures, with continual deterioration  
360 until death in early childhood (Nita et al., 2016). While PPT1 is thought to primarily localize to lysosomes  
361 with an essential role in lysosomal degradation of S-palmitoylated proteins (Lu et al., 1996), this protein  
362 also has a synapse-specific function in regulating synaptic vesicle cycling and synaptic transmission (Koster  
363 and Yoshii, 2019). We found that neuronal *Ppt1* expression was high in postnatal neurons of the spinal  
364 cord, olfactory bulb and mid/hindbrain, while microglia were the highest expressing non-neuronal cell  
365 type at both postnatal ages (Figure 5G, H). Neurodegeneration has been detected in the spinal cord prior  
366 to onset within the brain in *Ppt1* knock-out mice, accompanied by extensive glial cell activation including  
367 microgliosis, which is a pathological hallmark of CLN1 disease (Shyng et al., 2017). Mid-/hindbrain neurons  
368 also had high expression of *Ppt1*, consistent with reports that *Ppt1* knock-out mice show early signs of  
369 brain pathology in the thalamus (Kielar et al., 2007). Overall, we observed widespread *Ppt1* expression in  
370 almost every brain region in adult mice, consistent with the sweeping neurological deficits associated with

371 CLN1 disease (Figure 5I). Together, these observations reveal how the loss of *Ppt1* in cell types with high  
372 *Ppt1* expression may lead to cell death/dysfunction in the early stages of CLN1 disease.

### 373 **ZDHHC cell type enrichments can be used to predict and validate ZDHHC substrates**

374 We next tested if ZDHHC expression patterns identified from BrainPalmSeq could be used to  
375 predict and validate S-palmitoylation substrates for regionally enriched ZDHHCs. We focused on *Zdhhc9*,  
376 which showed a consistent cell-type enrichment in oligodendrocytes across multiple studies in  
377 BrainPalmSeq, while LOF mutations in *ZDHHC9* are known to result in reduced white matter integrity in  
378 the brain (Raymond et al., 2007). Examination of the Marques et al oligodendrocyte-specific scRNAseq  
379 dataset curated in BrainPalmSeq revealed that oligodendrocyte *Zdhhc9* expression increased throughout  
380 maturation, with highest expression in the myelin forming (MFOL) intermediate-maturity subtype of  
381 oligodendrocytes, while slightly lower expression is maintained in mature oligodendrocytes (MOL; Figure  
382 6A; Marques et al., 2016).

383 To identify potential substrates for ZDHHC9, we cross-referenced a list of MFOL/MOL enriched genes  
384 identified in the study by Marques et al (Marques et al., 2016) with the SwissPalm database to identify  
385 known palmitoylation substrates in these cell types (Swiss Palm Annotated; Figure 6B; Blanc et al., 2019,  
386 2015). PANTHER analysis of cellular component enrichments for these substrates revealed the most  
387 significant enrichment was for the term ‘myelin sheath’ (30 proteins; Figure 6C, Figure 6-figure  
388 supplement 1). To determine if any of the myelin sheath associated proteins could be palmitoylated by  
389 ZDHHC9, we selected three proteins (MOBP, PLP1 and CNP) for experimental validation (Figure 6C). We  
390 separately expressed each of these candidate substrates together with ZDHHC9 and its accessory protein  
391 GOLGA7 in HEK293T cells, and determined the proportion of palmitoylated substrate using an acyl-resin  
392 assisted capture (acyl-RAC) palmitoylation assay (Forrester et al., 2011). In this assay, free cysteine  
393 residues of cell lysates were first blocked, followed by cleavage of the palmitoyl-thioester bond with  
394 hydroxylamine, resulting in the exposure of a free sulfhydryl group. Cleaved lysates were then applied to  
395 a Sepharose resin to capture palmitoylated proteins containing a free sulfhydryl group. Un-bound proteins  
396 (Unpalm Fraction) were first extracted from the resin mixture, followed by elution of bound palmitoylated  
397 proteins from the resin (Palm Fraction). To assess non-specific binding of unpalmitoylated protein to the  
398 resin, half of the cell lysate was processed without the cleavage step (NSB control). Co-expression of HA-  
399 ZDHHC9 and FLAG-GOLGA7 increased the palmitoylated fraction of MOBP and PLP1, indicating that these  
400 proteins are substrates for ZDHHC9 (Figure 6D, E, G). Conversely, CNP was not identified as a ZDHHC9  
401 substrate in our assay (Figure 6F, G). These results demonstrate how the cell-type enrichments of ZDHHC

402 enzymes identified in this study can be used, along with the lists of similarly enriched palmitoylation  
403 substrates, to guide the identification of enzyme-substrate interactions that can be further investigated  
404 *in vivo*.

## 405 **Discussion**

### 406 **BrainPalmSeq as a tool to generate hypotheses about proteins that control S-palmitoylation in the** 407 **brain**

408 We have demonstrated the utility of BrainPalmSeq by providing examples of how this database  
409 can be used to explore detailed region and cell type-specific expression patterns of the known  
410 palmitoylating and de-palmitoylating enzymes, and their accessory proteins. We reveal how these  
411 expression patterns can be used to predict/validate S-palmitoylation substrates and better understand  
412 diseases associated with loss of function mutations in the enzymes that mediate S-palmitoylation. Given  
413 the number of brain regions and cell types incorporated into BrainPalmSeq that were not discussed in the  
414 present study, including the thalamus, hypothalamus, amygdala, striatum and cerebellum, there is rich  
415 potential for users to explore the data and generate hypotheses about the role of these enzymes in the  
416 brain.

### 417 **Insights into the role of S-palmitoylation associated enzymes in brain physiology and pathology**

418 While we found that many of the proteins we studied showed correlated expression across the  
419 entire mouse nervous system, particularly those enriched in neurons including *Zdhhc3*, *Zdhhc8*, *Zdhhc17*  
420 and *Zdhhc21*, expression of these genes was segregated within more narrowly defined neuronal  
421 populations such as the excitatory pyramidal neurons within the hippocampal tri-synaptic loop or layers  
422 of the somatosensory cortex. This is in line with the extensive neuronal transcriptional heterogeneity  
423 identified recently by a number of scRNAseq studies (Saunders et al., 2018; Yao et al., 2021; Zeisel et al.,  
424 2015, 2018). The genes that determine neuronal identity fall under four broad functional categories: those  
425 that control transcriptional programs, membrane conductance, neurotransmission, or synaptic  
426 connectivity (Zeisel et al., 2018). We also report heterogeneity in the neuronal fingerprint of  
427 palmitoylating and de-palmitoylating enzyme expression, which will in turn give rise to differential S-  
428 palmitoylation of neuronal proteins. Future work is needed to determine how these specific ZDHHC  
429 expression patterns are related to dynamic S-palmitoylation in these neuronal sub-types, and how the  
430 elevated expression of certain ZDHHCs can alter neuronal function. Given that S-palmitoylation is a key  
431 regulator of neuronal development, and that nearly half of all known synaptic proteins are substrates for

432 palmitoylation (Sanders et al., 2015), this heterogeneity is likely to be a key mechanism in the fine tuning  
433 of neuronal function and synaptic transmission.

434 Many of the ZDHHCs that we observed with consistently elevated expression across multiple  
435 studies in BrainPalmSeq have already been studied in the context of neuronal signaling, including ZDHHC2,  
436 ZDHHC3, ZDHHC8 and ZDHHC17 (Ji and Skup, 2021; Matt et al., 2019). In contrast, ZDHHC20 and ZDHHC21  
437 are relatively understudied in the nervous system, despite our observation that these are two of the most  
438 abundantly expressed ZDHHCs across neuronal cell types, with broad expression of *Zdhhc20* also in glial  
439 cells. A recent study defined a role for ZDHHC21 in the palmitoylation of serotonergic receptor 5-HT1A  
440 and implicated downregulation of ZDHHC21 in the development of major depressive disorder (Gorinski et  
441 al., 2019). Interestingly, both ZDHHC20 and ZDHHC21 have a potential role in the pathogenesis of  
442 Alzheimer's disease, as they can palmitoylate BACE1, Tau and amyloid precursor protein (Cho and Park,  
443 2016). Further work is required to understand the likely important role of these enzymes in the brain.

444 We made several other interesting observations during our examination of BrainPalmSeq that  
445 were not discussed in detail in the present study but we believe warrant further investigation. For  
446 example, the particularly elevated expression of *Zdhhc2* in peripheral sensory neurons may indicate an  
447 important role for palmitoylation in this cell type. Across multiple studies we observed striking enrichment  
448 of *Zdhhc14* in cerebellar Purkinje neurons, a cell type in which S-palmitoylation is known to be important  
449 for long-term depression, although the role of ZDHHC14 in this process has not yet been investigated  
450 (Thomas et al., 2013). *Zdhhc23* was similarly enriched in the CA2 region of the hippocampus, with  
451 comparatively low expression across other cell types. More broadly, the elevated expression of a variety  
452 of palmitoylating enzymes in neurons that utilize acetylcholine or monoamines as neurotransmitters  
453 would suggest an important role for S-palmitoylation in these neurons that has yet to be explored.  
454 Accordingly, many of the key proteins involved in cholinergic synaptic transmission are S-palmitoylation  
455 substrates including muscarinic acetylcholine receptor M2 (CHRM2), acetylcholinesterase (ACHE) and  
456 ATP-citrate synthase (ACLY; Blanc et al., 2015, 2019). Our observations of co-enrichment of certain  
457 palmitoylating and de-palmitoylating enzymes are also of interest, such as *Abhd17b* and *Zdhhc9* in  
458 oligodendrocytes. It is possible that these enzymes share substrates to mediate dynamic  
459 palmitoylation/de-palmitoylation, or conversely, have separate substrates in order to maintain stable S-  
460 palmitoylation states of certain oligodendrocyte expressed proteins. Importantly, the data accessibility in  
461 BrainPalmSeq will enable researchers to develop hypotheses regarding their cell type, brain region or  
462 protein of interest.

463           The palmitoylome of each cell type in the nervous system is likely to be highly heterogeneous and  
464 will be determined by the expression of both the *S*-palmitoylation substrates and the palmitoylating and  
465 de-palmitoylating enzymes in a given cell type. Furthermore, accumulating evidence has revealed that  
466 this palmitoylome can be altered by extrinsic factors such as chronic stress and neuronal activity (Kang et  
467 al., 2008; Zareba-Kozioł et al., 2019). While we have provided predicted palmitoylomes composed of  
468 several highly expressed or enriched *S*-palmitoylation substrates in select brain regions and cell types,  
469 experimental validation to reveal the relative palmitoylation of substrates under various conditions is  
470 needed to fully understand these cellular differences. Nevertheless, we were able utilize our predicted  
471 palmitoylomes to validate substrates for ZDHHC9, providing insight into the potential role of this enzyme  
472 in myelin regulation in the brain.

473           Neurological disorders that arise from LOF gene mutations may be predicted to lead to  
474 pathological changes that are more severe in the brain regions in which these genes are most highly  
475 expressed. We observed this type of regional overlay for the expression patterns of *Zdhhc8*, *Zdhhc9* and  
476 *Ppt1*. Numerous other brain disorders are thought to be exacerbated by an imbalance in *S*-palmitoylation,  
477 such as decreased *S*-palmitoylation of HTT in Huntington's disease (Virlogeux et al., 2021; Yanai et al.,  
478 2006), increased *S*-palmitoylation of APP and TAU in Alzheimer's disease (Cho and Park, 2016), and  
479 reduced *S*-palmitoylation of 5-HTA receptor in major depressive disorder (Gorinski et al., 2019). Efforts  
480 are already underway to normalize aberrant *S*-palmitoylation in neurological diseases in order to improve  
481 clinical outcomes (Roberts et al., 2012; Virlogeux et al., 2021). Understanding the brain expression  
482 patterns of the enzymes that mediate palmitoylation in these diseases will be paramount to developing  
483 and targeting such therapeutics.

#### 484 **Differential gene expression as a means to control *S*-palmitoylation in the brain**

485           The mechanisms that govern ZDHHC enzyme-substrate interactions are complex and still not fully  
486 understood. While the majority of post-translational modifications including phosphorylation and N-  
487 glycosylation are highly sequence specific (Schwarz and Aebi, 2011; Ubersax and Ferrell, 2007), several  
488 studies have revealed that *S*-palmitoylation by ZDHHCs can be stochastic, proximity based and lacking in  
489 stereo-selectivity (Rocks et al., 2010; Rodenburg et al., 2017). Contrasting studies have shown that  
490 numerous ZDHHCs have specific protein interacting domains including ankyrin repeat (AR), PDZ and SH3  
491 domains that facilitate substrate interactions, providing support for a model in which more specific  
492 enzyme-substrate interactions can govern *S*-palmitoylation (Abrami et al., 2017; Lemonidis et al., 2015;  
493 Plain et al., 2020; Rana et al., 2018; Thomas et al., 2012; Verardi et al., 2017). Furthermore, a recent study



494 found striking substrate specificity for several ZDHHCs with the G-protein subunit G $\alpha$ o, and revealed  
495 intriguing observations that the subcellular localization of a number of S-palmitoylation substrates could  
496 be controlled by changing the localization, and importantly, the expression of certain ZDHHC enzymes. In  
497 this study, S-palmitoylated substrates were found to accumulate in the subcellular compartment in which  
498 their partner ZDHHCs were targeted (Solis et al., 2020). This is particularly relevant as the ZDHHCs are  
499 known to have diverse subcellular localizations including the Golgi, ER, endosomes and plasma membrane  
500 (Globa and Bamji, 2017). Transcriptional control of differentially compartmentalized palmitoylating and  
501 de-palmitoylating enzymes could therefore be an essential mechanism for regulating the subcellular  
502 localization, and function, of S-palmitoylated protein substrates. Accordingly, LOF mutations in certain  
503 ZDHHC enzymes leads to cell type-specific disruption in S-palmitoylation that is not compensated by other  
504 members of the large ZDHHC family. We provide a means to investigate the expression of the proteins  
505 that mediate S-palmitoylation, making BrainPalmSeq an invaluable resource to both researchers and  
506 clinicians that are working to better understand the role of S-palmitoylation in the brain.

507

## 508 **Figure Legends**

### 509 **Figure 1. Heterogeneous ZDHHC expression in the mouse nervous system**

510 (A) Heatmap showing expression for the 24 ZDHHC genes, extracted from scRNAseq study of mouse CNS  
511 and PNS (Zeisel et al., 2018). Each column represents one of the 265 metacells classified in the study.  
512 Metacells are organized along x-axis according to hierarchical clustering designations generated by Zeisel  
513 et al. Full metadata for this study available on BrainPalmSeq.

514 (B) Heatmap showing mean ZDHHC expression per hierarchical cluster, with columns and rows sorted by  
515 descending mean ZDHHC expression per row/column.

516 (C) Heatmap showing mean ZDHHC expression per neurotransmitter cluster for all PNS and CNS neurons.  
517 Columns and rows are sorted as in B.

518 (D) Correlation network showing ZDHHC co-expression across all metacells in 'MouseBrain' (Spearman R  
519 > 0.5). Numbers in nodes correspond to ZDHHC number. Node color represents mean expression across  
520 all metacells. Edge thickness represents strength of correlation.

521 (E) Graph showing proportion of genes from 'MouseBrain' dataset that are co-expressed with one or more  
522 ZDHHC and also substrates for S-palmitoylation (SwissPalm annotated). 'Brain expressed'  $n = 15,389$   
523 protein coding genes expressed in the postnatal mouse brain, curated from the MGI RNAseq studies  
524 database. 'R > 0.7 ZDHHC co-expressed'  $n = 914$  genes co-expressed with one or more ZDHHC (Spearman  
525 R > 0.7). 'R > 0.8 ZDHHC co-expressed'  $n = 167$  genes co-expressed with one or more ZDHHC (Spearman R  
526 > 0.8). Brain expressed vs. R > 0.7:  $p < 0.001$ ; R > 0.7 vs R > 0.8:  $p < 0.01$ ; Fisher's exact test.

527 (F) Graph of GO biological process analysis. Gene IDs from the 'MouseBrain' dataset (Zeisel et al., 2018)  
528 that showed correlated expression with one or more ZDHHC (R > 0.7) and were also Uniprot reviewed and  
529 SwissPalm annotated were used as input.

530 Units for all heatmaps in figure: mean  $\log_2(\text{counts per } 10,000 + 1)$ .

### 531 **Figure 2. Diversity in ZDHHC expression and S-palmitoylation substrate expression in the hippocampus**

532 (A) Heatmap of excitatory neuron ZDHHC expression from dorsal hippocampus (original pooled cell  
533 RNAseq data from Cembrowski et al., 2016) projected onto diagrams of dorsal hippocampus.

534 (B) Hierarchical clustering of ZDHHC expression data in A.

535 (C) Heatmap showing top 6 ranked expressing ZDHHCs in dorsal CA1 in descending order.

536 (D) Pie chart showing proportion genes with enriched expression in dorsal CA1 (dCA1) that are also  
537 substrates for palmitoylation (SwissPalm annotated).

538 (E) KEGG analysis of the dCA1 enriched/SwissPalm annotated genes.

539 (F) SynGO analysis of the dCA1 enriched/SwissPalm annotated genes.

540 (G-J) As in (C)-(F) but for the dorsal dentate gyrus (dDG).

541 Heatmap legend in (A) applies to all heatmaps ( $\log_{\text{FKPM}}+1$ ).

542 **Figure 3. Pyramidal neuron layer specific ZDHHC expression**

543 (A) Heatmap of excitatory neuron ZDHHC expression from somatosensory cortex (original data scRNAseq  
544 data from Zeisel et al., 2015) projected onto diagrams of cortical layers.

545 (B) Hierarchical clustering of ZDHHC expression data in A. Heatmap units in (A, B): mean  $\log_2(\text{counts per}$   
546  $10,000 + 1)$

547 (C) Heatmap of scRNAseq data from Allen Brain 10X genomics (Yao et al., 2021). Data are represented as  
548 mean ZDHHC expression per excitatory neuron subtype, with columns and rows sorted by descending  
549 mean ZDHHC expression per row/column.

550 (D) As in (C) but for inhibitory neuron subtypes. Heatmap units for (C, D): trimmed mean (25%-75%)  
551  $\log_2(\text{CPM}+1)$

552 **Figure 4. Heterogeneous de-palmitoylating enzyme and ZDHHC accessory protein expression in the**  
553 **mouse nervous system**

554 (A) Heatmap showing expression of de-palmitoylating enzymes (top) and ZDHHC accessory subunits  
555 (bottom), extracted from scRNAseq study of mouse CNS and PNS (Zeisel et al., 2018). Each column  
556 represents one of the 265 metacells classified in the study. Metacells are organized according to  
557 hierarchical clustering designations generated by Zeisel et al.

558 (B) Heatmap showing mean de-palmitoylating enzyme expression per hierarchical cluster, with columns  
559 and rows sorted by descending mean ZDHHC expression per row/column.

560 (C) As B but for ZDHHC accessory proteins.

561 (D) Correlation network showing ZDHHC co-expression with de-palmitoylating enzymes and accessory  
562 proteins across all metacells in 'MouseBrain' (Spearman  $R > 0.4$ ). Node color represents mean expression  
563 across all metacells. Edge thickness represents strength of correlation.

564 **Figure 5. Disease associated palmitoylating enzyme regional and cell-type expression overlays with**  
565 **brain pathology in associated LOF disorders**

566 (A) Heatmap showing ranked *Zdhhc8* expressing neuronal and glial cell types in descending order. Original  
567 data from scRNAseq neonatal mouse brain study; Rosenberg et al., 2018. Cell types were averaged as  
568 described in Supplementary File 3. Heatmap units: mean  $\log_2(\text{counts per } 10,000 + 1)$ .

569 (B) As in A, but original data from scRNAseq adolescent mouse brain study Zeisel et al (2018). Heatmap  
570 units: mean  $\log_2(\text{counts per } 10,000 + 1)$ .

571 (C) Heatmap of *Zdhhc8* expression from whole brain regional bulk RNAseq data (original data from  
572 'Protein Atlas'; Sjöstedt et al., 2020) projected onto anatomical map of mouse brain. Heatmap units:  
573 pTPM.

574 (D-F) As in (A)-(C) but for *Zdhhc9*.

575 (G-I) As in (A)-(C) but for *Ppt1*.

576 **Figure 6. Validation of predicted S-palmitoylation substrates of *Zdhhc9* derived from cell-type**  
577 **enriched expression**

578 (A) Graph of expression data for *Zdhhc9* extracted from BrainPalmSeq. Original data from oligodendrocyte  
579 scRNAseq study by Marques et al. Expression units: mean  $\log_2(\text{counts per } 10,000 + 1)$ .

580 (B) Diagram illustrating workflow to generate a list of oligodendrocyte enriched palmitoylation  
581 substrates, GO annotated for myelin sheath for experimental validation.

582 (C) STRING diagram of myelin sheath annotated palmitoylation substrates.

583 (D) Western blot following Acyl-RAC palmitoylation assay in HEK293 cells to identify palmitoylated and  
584 unpalmitoylated fractions of FLAG-MOBP either without or with co-transfection of FLAG-GOLGA7 and  
585 HA-ZDHHC9. Input = unprocessed protein lysate. NSB control = non-specific binding of unpalmitoylated  
586 protein to sepharose resin in control pipeline. Palm fraction = palmitoylated protein (bound to  
587 sepharose resin). Unpalm fraction = unpalmitoylated protein (did not bind to sepharose resin).

588 (E-F) As in (D) but for FLAG-PLP1 (E) or FLAG-CNP (F).

589 (G) Graphs quantifying the ratio of palmitoylated to unpalmitoylated protein either with or without co-  
590 transfusions with FLAG-GOLGA7 and HA-ZDHHC9.  $n = 4-6$  HEK cell cultures per condition. Statistics  
591 shown for palmitoylated fraction. Two-way ANOVA; Šídák's *post hoc*; mean  $\pm$  SEM. MOB:  $p = 0.0004$ ,  
592 95% CI -0.6594 to -0.2266; PLP1:  $p = 0.0046$ , 95% CI -0.1660 to -0.03011; CNP:  $p = 0.6981$ , 95% CI -  
593 0.3274 to 0.1742.

594 **Source Data Legends**

595 **Figure 1 – Source data 1.** ZDHHC expression in the mouse nervous system

596 **Figure 2 – Source data 1.** ZDHHC expression and S-palmitoylation substrate expression in the  
597 hippocampus

598 **Figure 3 – Source data 1.** ZDHHC expression cortical neurons

599 **Figure 4 – Source data 1.** De-palmitoylating enzyme and ZDHHC accessory protein expression in the  
600 mouse nervous system

601 **Figure 5 – Source data 1.** Disease associated palmitoylating enzyme regional and cell-type expression  
602 patterns

603 **Figure 6 – Source data 1.** Validation of predicted S-palmitoylation substrates of *Zdhhc9*

## 604 **Materials and Methods**

### 605 **Data processing for BrainPalmSeq**

606 For Zeisel et al., 2018 ('MouseBrain'), single-cell counts (UMI from 3' end counting) were downloaded  
607 from MouseBrain.org (loom file named I5\_all.loom), and log normalized by first scaling the expression  
608 values provided to a sum of 10,000 per cell before calculating  $\log_2(\text{scaled\_counts}+1)$ . Averages were then  
609 performed by brain region, neurotransmitter and taxonomy for each gene.

610 For DropViz Metacell counts were downloaded from DropViz.org (count file  
611 metacells.BrainCellAtlas\_Saunders\_version\_2018.04.01.RDS and annotation file  
612 annotation.BrainCellAtlas\_Saunders\_version\_2018.04.01.RDS) and log normalized by first scaling the  
613 expression values provided to a sum of 10,000 per metacell before calculating  $\log_2(\text{scaled\_counts}+1)$ .  
614 Averages were then performed by cell type, tissue and class for each gene. Genes associated with  
615 palmitoylation were selected in order to create the heatmaps.

616 For Zeisel, single-cell counts (UMI from 3' end counting) were downloaded from  
617 [https://storage.googleapis.com/linnarsson-lab-www-blobs/blobs/cortex/expression\\_mRNA\\_17-Aug-](https://storage.googleapis.com/linnarsson-lab-www-blobs/blobs/cortex/expression_mRNA_17-Aug-2014.txt)  
618 [2014.txt](https://storage.googleapis.com/linnarsson-lab-www-blobs/blobs/cortex/expression_mRNA_17-Aug-2014.txt), and log normalized by first scaling the expression values provided to a sum of 10,000 per cell  
619 before calculating  $\log_2(\text{scaled\_counts}+1)$ . Averages were then performed by cluster, tissue and class for  
620 each gene. Genes associated with palmitoylation were selected in order to create the heatmaps,  
621 categories comprising fewer than 5 single cells are not displayed.

622 For Marques, single-cell counts (UMI from 3' end counting) were downloaded from GEO with accession  
623 ID GSE75330 (file GSE75330\_Marques\_et\_al\_mol\_counts2.tab) and log normalized by first scaling the  
624 expression values provided to a sum of 10,000 per cell before calculating  $\log_2(\text{scaled\_counts}+1)$ . Averages  
625 were then performed by cluster and region for each gene. Genes associated with palmitoylation were  
626 selected in order to create the heatmaps, categories comprising fewer than 5 single cells are not displayed.

627 For Rosenberg, single-cell counts (UMI from 3' end counting) were downloaded from GSE110823, and log  
628 normalized by first scaling the expression values provided to a sum of 10,000 per cell before calculating  
629  $\log_2(\text{scaled\_counts}+1)$ . Averages were then performed by brain region, neurotransmitter and taxonomy  
630 for each gene. Genes associated with palmitoylation were selected in order to create the heatmaps.

631 Data from Sjöstedt et al. were downloaded as Protein-coding transcripts per million (pTPM) from  
632 [proteinatlas.org](https://proteinatlas.org/) ("RNA mouse brain region gene data") and not further processed.

633 For Hipposeq, expression data were downloaded as FKPM directly from [hippseq.janelia.org](https://hippseq.janelia.org/) and were  
634 not further processed.

635 For Allen Brain 10X data, expression data were downloaded as trimmed means (25%-75%)  $\log_2(\text{CPM}+1)$   
636 from [portal.brain-map.org/](https://portal.brain-map.org/) and were not further processed.

### 637 **Correlation analysis**

638 Spearman correlation values between genes and their significances were calculated in R using the  
639 expression results obtained for each cell type as described above.

## 640 **Identification of S-palmitoylation substrates with SwissPalm**

641 Gene lists were inputted into SwissPalm (<https://swisspalm.org/proteins>) input file function and cross-  
642 referenced with 'Dataset 3: Palmitoylation validated or found in at least one palmitoyl-proteome  
643 (SwissPalm annotated)' for *Mus musculus*, with an additional filter for UniProt 'Reviewed' proteins.

## 644 **Generating a predicted palmitoylome for dorsal hippocampus**

645 To curate the regionally enriched predicted-palmitoylome, the enrichment analysis tools in hipposeq  
646 (<https://hipposeq.janelia.org/>) were used to compare each of the selected Cell Lines vs the other Cell Lines  
647 in the analysis (Selected Cell Lines = dorsal DG, CA3, CA2 and CA1), with the following parameters: 'Fold  
648 threshold' = 1.5; 'FKPMmin threshold' = 5, 'FDR' = 0.05. The resulting lists of regionally enriched transcripts  
649 were cross referenced with SwissPalm as described above to identify regionally enriched S-palmitoylation  
650 substrates.

## 651 **Bioinformatic analysis**

652 Gene Ontology (GO) analysis was performed using statistical overrepresentation tests in PANTHER16.0  
653 (Mi et al., 2009) with default settings and *Mus musculus* as the reference species. Biological process GO  
654 terms were extracted and ranked according to false discovery rate (FDR). Kyoto Encyclopedia of Genes  
655 and Genomes (KEGG) analysis was performed using the web-based program Enrichr (Chen et al., 2013;  
656 Kuleshov et al., 2016) and ranked according to -log Adjusted P-value. Synaptic Gene Ontologies (SynGO;  
657 version 1.1) analysis was performed using default settings with brain expressed genes as a background  
658 and terms for 'biological process' were ranked according to -log Adjusted P-value. Functional protein  
659 interaction networks were identified using the Search Tool for the Retrieval of Interacting Genes (STRING)  
660 11.0 (Szklarczyk et al., 2019) with *Mus musculus* as the reference species. Seven types of protein  
661 interactions were used for network generation, including text mining, neighborhood, co-occurrence, co-  
662 expression, gene fusion, experiments and databases.

## 663 **Data presentation**

664 Heatmaps were plotted and hierarchical clustering performed in Displayr (<https://www.displayr.com>)  
665 using the 'Dendrogram' function. Cytoscape (Version 3.8.0) was used to draw correlation networks.

## 666 **Heatmap creation for BrainPalmSeq**

667 All plots for the BrainPalmSeq database were generated using curated RNA sequencing datasets. Python  
668 3 and Javascript scripts were used with the plotting library Bokeh to generate the interactive heatmaps to  
669 display and compare these datasets on the BrainPalmSeq website (Bokeh Development Team, 2018).

## 670 **Cell culture**

671 HEK293T cells were thawed and aliquoted into a 10cm dish with 10mL prewarmed (37°C) DMEM  
672 (GIBCO, Thermo Fisher Scientific, Waltham, MA) supplemented with 10% fetal bovine serum (FBS)  
673 (GIBCO, Thermo Fisher Scientific, Waltham, MA) and 1% Pen/Strep(P/S) (GIBCO, Thermo Fisher  
674 Scientific, Waltham, MA). HEK293T cells were then placed in a 37°C incubator with 5% CO<sub>2</sub> and  
675 passaged approximately every 5 days, or once confluency was achieved.

## 676 **Transfection**

677 70%-80% confluent HEK293T cells were transfected using Lipofectamine 2000 (Invitrogen/Life  
678 Technologies, Carlsbad, CA) according to the manufacturer's recommendations. Each well of a 6-well  
679 plate was transfected with a total of 3ug DNA, 150uL of Opti-Mem (GIBCO, Thermo Fisher Scientific,  
680 Waltham, MA) was used with 6uL of Lipofectamine 2000 (Invitrogen/Life Technologies, Carlsbad, CA).  
681 Experimental condition wells were transfected with 1ug of the indicated construct of interest, 1ug of  
682 HA-DHHC9 (mouse; Shimell et al., 2019), and 1ug of FLAG-GOLGA7 (Maurine Linder, Washington  
683 University School of Medicine). Human FLAG-MOBP (CAT#: RC223946), FLAG-PLP1 (CAT#: RC218616)  
684 and FLAG-CNP (CAT#: RC207038) were acquired from Origene, Maryland, USA. Control condition wells  
685 were transfected with 1ug of the indicated construct of interest, and 2ug of a scrambled control  
686 plasmid. Cells were lysed using the acyl-RAC assay lysis buffer 48hours after transfection.

## 687 **Palmitoylation Assay (acyl-RAC)**

688 The commercially available CAPTUREome S-palmitoylated protein kit (Badrilla, Leeds, UK) was used in  
689 accordance with the manufacturer's guidelines with three optimizations: (1) prior to the cell lysis step,  
690 wells were washed with 1mL of 1X PBS to eliminate any dead cells or residual media; (2) during the cell  
691 lysis step, DNase (Sigma-Aldrich, St. Louis, MO), was added to the solution (5uL per 500uL of lysis  
692 buffer); and (2) protein concentration was measured prior to the separation of experimental sample and  
693 negative control sample using the BCA Assay (Pierce, Thermo Fisher Scientific, Waltham, MA).

## 694 **Western Blot Analysis**

695 Western blotting was performed using 4% stacking and 12% resolving SDS-PAGE gels. PVDF membranes  
696 were then blocked for 1hour at room temperature with 5% BSA in 0.05% TBS-T. PVDF membranes were  
697 incubated with the indicated primary antibodies (anti-HA: Cell Signaling Technology, C29F4, Rabbit mAb  
698 CAT#: 3724, 1:1000; anti-FLAG: Origene, mouse monoclonal antibody, CAT#: TA50011-100, 1:1000)  
699 overnight at 4°C. Proteins were then visualized using enhanced chemiluminescence (Immubilon Western  
700 Chemiluminescent HRP Substrate) on a BioRad ChemiDoc XRS+ scanner. Blots were then quantified  
701 using Fiji1 software. The palmitoylated and unpalmitoylated fractions were calculated using the  
702 following equations respectively: (Palm Fraction / (Palm Fraction + Unpalm Fraction)) and (Unpalm  
703 Fraction / (Palm Fraction + Unpalm Fraction)). Criteria for data inclusion were sufficient  
704 transfection/antibody signal and minimal protein in the non-specific binding control.

## 705 **Statistical Analysis**

706 Spearman correlations were performed with the function `cor` in R, and their significances were obtained  
707 using the function `cor.test` followed by a correction for multiple testing using `p.adjust` with the `fdr`  
708 method (Benjamini & Hochberg). For assessing enrichment of S-palmitoylation substrates within *Zdhhc*  
709 co-expressed genes, Fisher's exact test was performed using the function `fisher.test` in R.

710 For validation of substrates using Acyl-Rac palmitoylation assay, two-way ANOVA with Šídák's *post hoc*  
711 was used to assess significance of both palmitoylated and unpalmitoylated fractions. Statistics are  
712 shown for palmitoylated fraction. No outliers were excluded. Statistical analyses were performed in  
713 GraphPad Prism 9.2.0 (San Diego, CA, USA). *n* represents the number of individual HEK cell culture  
714 dishes. Each culture dish is defined as a biological replicate. No technical replicates were performed.

715 **Acknowledgements**

716 The authors would like to thank Drs. A. Ciernia, M. Cembrowski, T. Murphy and J. LeDue for helpful  
717 discussion. This work was supported by CIHR Foundation grant (F18-00650) to SXB and by computational  
718 resources made available through the NeuroImaging and NeuroComputation Centre at the Djavad  
719 Mowafaghian Centre for Brain Health (RRID SCR\_019086) and the Dynamic Brain Circuits in Health and  
720 Disease Research Excellence Cluster DataBinge Forum.



721 **References**

- 722 Abrami L, Dallavilla T, Sandoz PA, Demir M, Kunz B, Savoglidis G, Hatzimanikatis V, van Der Goot FG.  
723 2017. Identification and dynamics of the human ZDHHC16-ZDHHC6 palmitoylation cascade. *eLife* **6**.  
724 doi:10.7554/eLife.27826
- 725 Baker K, Astle DE, Scerif G, Barnes J, Smith J, Moffat G, Gillard J, Baldeweg T, Raymond FL. 2015.  
726 Epilepsy, cognitive deficits and neuroanatomy in males with ZDHHC9 mutations. *Annals of Clinical*  
727 *and Translational Neurology* **2**:559–569. doi:10.1002/acn3.196
- 728 Bathelt J, Astle D, Barnes J, Raymond FL, Baker K. 2016. Structural brain abnormalities in a single gene  
729 disorder associated with epilepsy, language impairment and intellectual disability. *NeuroImage:*  
730 *Clinical* **12**:655–665. doi:10.1016/j.nicl.2016.07.016
- 731 Bathelt J, Barnes J, Raymond FL, Baker K, Astle D. 2017. Global and Local Connectivity Differences  
732 Converge With Gene Expression in a Neurodevelopmental Disorder of Known Genetic Origin.  
733 *Cerebral Cortex* **27**:3806–3817. doi:10.1093/cercor/bhx027
- 734 Bird CM, Burgess N. 2008. The hippocampus and memory: Insights from spatial processing. *Nature*  
735 *Reviews Neuroscience* **9**:182–194. doi:10.1038/nrn2335
- 736 Blanc M, David F, Abrami L, Migliozi D, Armand F, Bürgi J, van der Goot FG. 2015. SwissPalm: Protein  
737 Palmitoylation database. *F1000Research* **4**. doi:10.12688/f1000research.6464.1
- 738 Blanc M, David FPA, van der Goot FG. 2019. SwissPalm 2: Protein S-palmitoylation database Methods in  
739 Molecular Biology. Humana Press Inc. pp. 203–214. doi:10.1007/978-1-4939-9532-5\_16
- 740 Chen EY, Tan CM, Kou Y, Duan Q, Wang Z, Meirelles G V., Clark NR, Ma’ayan A. 2013. Enrichr: Interactive  
741 and collaborative HTML5 gene list enrichment analysis tool. *BMC Bioinformatics* **14**.  
742 doi:10.1186/1471-2105-14-128
- 743 Chen WY, Shi YY, Zheng YL, Zhao XZ, Zhang GJ, Chen SQ, Yang P Di, He L. 2004. Case-control study and  
744 transmission disequilibrium test provide consistent evidence for association between  
745 schizophrenia and genetic variation in the 22q11 gene ZDHHC8. *Human Molecular Genetics*  
746 **13**:2991–2995. doi:10.1093/hmg/ddh322
- 747 Cho E, Park M. 2016. Palmitoylation in Alzheimer’s disease and other neurodegenerative diseases.  
748 *Pharmacological Research* **111**:133–151. doi:10.1016/j.phrs.2016.06.008

- 749 Forrester MT, Hess DT, Thompson JW, Hultman R, Moseley MA, Stamler JS, Casey PJ. 2011. Site-specific  
750 analysis of protein S-acylation by resin-assisted capture. *Journal of Lipid Research* **52**:393–398.  
751 doi:10.1194/JLR.D011106/ATTACHMENT/AA2B322B-A63D-41C0-A864-92DAC7C09076/MMC1.PDF
- 752 Fredericks G, Hoffmann F, Hondal R, Rozovsky S, Urschitz J, Hoffmann P. 2017. Selenoprotein K Increases  
753 Efficiency of DHH6 Catalyzed Protein Palmitoylation by Stabilizing the Acyl-DHH6 Intermediate.  
754 *Antioxidants* **7**:4. doi:10.3390/antiox7010004
- 755 Fredericks GJ, Hoffmann FKW, Rose AH, Osterheld HJ, Hess FM, Mercier F, Hoffmann PR. 2014. Stable  
756 expression and function of the inositol 1,4,5-triphosphate receptor requires palmitoylation by a  
757 DHH6/selenoprotein K complex. *Proceedings of the National Academy of Sciences of the United*  
758 *States of America* **111**:16478–16483. doi:10.1073/pnas.1417176111
- 759 Fukata Y, Dimitrov A, Boncompain G, Vielemeyer O, Perez F, Fukata M. 2013. Local palmitoylation cycles  
760 define activity-regulated postsynaptic subdomains. *Journal of Cell Biology* **202**:145–161.  
761 doi:10.1083/jcb.201302071
- 762 Fukata Y, Fukata M. 2010. Protein palmitoylation in neuronal development and synaptic plasticity.  
763 *Nature Reviews Neuroscience* **11**:161–175. doi:10.1038/nrn2788
- 764 Glantz LA, Lewis DA. 2000. Decreased dendritic spine density on prefrontal cortical pyramidal neurons in  
765 schizophrenia. *Archives of General Psychiatry* **57**:65–73. doi:10.1001/archpsyc.57.1.65
- 766 Globa AK, Bamji SX. 2017. Protein palmitoylation in the development and plasticity of neuronal  
767 connections. *Current Opinion in Neurobiology* **45**:210–220. doi:10.1016/j.conb.2017.02.016
- 768 Gorinski N, Bijata M, Prasad S, Wirth A, Abdel Galil D, Zeug A, Bazovkina D, Kondaurova E, Kulikova E,  
769 Ilchibaeva T, Zareba-Kozioł M, Papaleo F, Scheggia D, Kochlamazashvili G, Dityatev A, Smyth I,  
770 Krzystyniak A, Włodarczyk J, Richter DW, Strekalova T, Sigrist S, Bang C, Hobuß L, Fiedler J, Thum T,  
771 Naumenko VS, Pandey G, Ponimaskin E. 2019. Attenuated palmitoylation of serotonin receptor 5-  
772 HT1A affects receptor function and contributes to depression-like behaviors. *Nature*  
773 *Communications* **10**:1–14. doi:10.1038/s41467-019-11876-5
- 774 Haque A, Engel J, Teichmann SA, Lönnberg T. 2017. A practical guide to single-cell RNA-sequencing for  
775 biomedical research and clinical applications. *Genome Medicine* **9**:1–12. doi:10.1186/s13073-017-  
776 0467-4

- 777 Harris KD, Shepherd GMG. 2015. The neocortical circuit: Themes and variations. *Nature Neuroscience*  
778 **18**:170–181. doi:10.1038/nn.3917
- 779 Ji B, Skup M. 2021. Roles of palmitoylation in structural long-term synaptic plasticity. *Molecular Brain*  
780 **14**:1–27. doi:10.1186/s13041-020-00717-y
- 781 Kang R, Wan J, Arstikaitis P, Takahashi H, Huang K, Bailey AO, Thompson JX, Roth AF, Drisdell RC, Mastro  
782 R, Green WN, Yates JR, Davis NG, El-Husseini A. 2008. Neural palmitoyl-proteomics reveals dynamic  
783 synaptic palmitoylation. *Nature* **456**:904–909. doi:10.1038/nature07605
- 784 Karayiorgou M, Simon TJ, Gogos JA. 2010. 22q11.2 microdeletions: Linking DNA structural variation to  
785 brain dysfunction and schizophrenia. *Nature Reviews Neuroscience* **11**:402–416.  
786 doi:10.1038/nrn2841
- 787 Kolluri N, Sun Z, Sampson AR, Lewis DA. 2005. Lamina-specific reductions in dendritic spine density in  
788 the prefrontal cortex of subjects with schizophrenia. *American Journal of Psychiatry* **162**:1200–  
789 1202. doi:10.1176/appi.ajp.162.6.1200
- 790 Koopmans F, van Nierop P, Andres-Alonso M, Byrnes A, Cijssouw T, Coba MP, Cornelisse LN, Farrell RJ,  
791 Goldschmidt HL, Howrigan DP, Hussain NK, Imig C, de Jong APH, Jung H, Kohansalnodehi M,  
792 Kramarz B, Lipstein N, Lovering RC, MacGillavry H, Mariano V, Mi H, Ninov M, Osumi-Sutherland D,  
793 Pielot R, Smalla KH, Tang H, Tashman K, Toonen RFG, Verpelli C, Reig-Viader R, Watanabe K, van  
794 Weering J, Achsel T, Ashrafi G, Asi N, Brown TC, De Camilli P, Feuermann M, Foulger RE, Gaudet P,  
795 Joglekar A, Kanellopoulos A, Malenka R, Nicoll RA, Pulido C, de Juan-Sanz J, Sheng M, Südhof TC,  
796 Tilgner HU, Bagni C, Bayés À, Biederer T, Brose N, Chua JJE, Dieterich DC, Gundelfinger ED,  
797 Hoogenraad C, Hugarir RL, Jahn R, Kaeser PS, Kim E, Kreutz MR, McPherson PS, Neale BM,  
798 O'Connor V, Posthuma D, Ryan TA, Sala C, Feng G, Hyman SE, Thomas PD, Smit AB, Verhage M.  
799 2019. SynGO: An Evidence-Based, Expert-Curated Knowledge Base for the Synapse. *Neuron*  
800 **103**:217-234.e4. doi:10.1016/j.neuron.2019.05.002
- 801 Koster KP, Yoshii A. 2019. Depalmitoylation by palmitoyl-protein thioesterase 1 in neuronal health and  
802 degeneration. *Frontiers in Synaptic Neuroscience* **11**:25. doi:10.3389/fnsyn.2019.00025
- 803 Kouskou M, Thomson DM, Brett RR, Wheeler L, Tate RJ, Pratt JA, Chamberlain LH. 2018. Disruption of  
804 the *Zdhhc9* intellectual disability gene leads to behavioural abnormalities in a mouse model.  
805 *Experimental Neurology* **308**:35–46. doi:10.1016/J.EXPNEUROL.2018.06.014

- 806 Kuleshov M V., Jones MR, Rouillard AD, Fernandez NF, Duan Q, Wang Z, Koplev S, Jenkins SL, Jagodnik  
807 KM, Lachmann A, McDermott MG, Monteiro CD, Gundersen GW, Ma'ayan A. 2016. Enrichr: a  
808 comprehensive gene set enrichment analysis web server 2016 update. *Nucleic acids research*  
809 **44**:W90–W97. doi:10.1093/nar/gkw377
- 810 Lemonidis K, Sanchez-Perez MC, Chamberlain LH. 2015. Identification of a novel sequence motif  
811 recognized by the ankyrin repeat domain of zDHHC17/13 S-acyltransferases. *Journal of Biological*  
812 *Chemistry* **290**:21939–21950. doi:10.1074/jbc.M115.657668
- 813 Lin DTS, Conibear E. 2015. ABHD17 proteins are novel protein depalmitoylases that regulate N-Ras  
814 palmitate turnover and subcellular localization. *eLife* **4**. doi:10.7554/eLife.11306
- 815 Lu JY, Verkruyse LA, Hofmann SL. 1996. Lipid thioesters derived from acylated proteins accumulate in  
816 infantile neuronal ceroid lipofuscinosis: Correction of the defect in lymphoblasts by recombinant  
817 palmitoyl-protein thioesterase. *Proceedings of the National Academy of Sciences of the United*  
818 *States of America* **93**:10046–10050. doi:10.1073/pnas.93.19.10046
- 819 Ma Y, Liu H, Ou Z, Qi C, Xing R, Wang S, Han Y, Zhao T-J, Chen Y. 2021. DHHC5 facilitates oligodendrocyte  
820 development by palmitoylating and activating STAT3. *Glia*. doi:10.1002/glia.24113
- 821 Malgapo MIP, Linder ME. 2021. Substrate recruitment by zDHHC protein acyltransferases. *Open Biology*  
822 **11**:rsob.210026. doi:10.1098/rsob.210026
- 823 Marques S, Zeisel A, Codeluppi S, Van Bruggen D, Falcão AM, Xiao L, Li H, Häring M, Hochgerner H,  
824 Romanov RA, Gyllborg D, Muñoz-Manchado AB, La Manno G, Lönnerberg P, Floriddia EM, Rezayee  
825 F, Ernfors P, Arenas E, Hjerling-Leffler J, Harkany T, Richardson WD, Linnarsson S, Castelo-Branco G.  
826 2016. Oligodendrocyte heterogeneity in the mouse juvenile and adult central nervous system.  
827 *Science* **352**:1326–1329. doi:10.1126/science.aaf6463
- 828 Matt L, Kim K, Chowdhury D, Hell JW. 2019. Role of palmitoylation of postsynaptic proteins in promoting  
829 synaptic plasticity. *Frontiers in Molecular Neuroscience*. doi:10.3389/fnmol.2019.00008
- 830 Mi H, Dong Q, Muruganujan A, Gaudet P, Lewis S, Thomas PD. 2009. PANTHER version 7: Improved  
831 phylogenetic trees, orthologs and collaboration with the Gene Ontology Consortium. *Nucleic Acids*  
832 *Research* **38**. doi:10.1093/nar/gkp1019
- 833 Mitchell DA, Hamel LD, Reddy KD, Farh L, Rettew LM, Sanchez PR, Deschenes RJ. 2014. Mutations in the

- 834 X-linked intellectual disability gene, zDHHC9, alter autopalmitoylation activity by distinct  
835 mechanisms. *Journal of Biological Chemistry* **289**:18582–18592. doi:10.1074/jbc.M114.567420
- 836 Mukai J, Liu H, Burt RA, Swor DE, Lai WS, Karayiorgou M, Gogos JA. 2004. Evidence that the gene  
837 encoding ZDHHC8 contributes to the risk of schizophrenia. *Nature Genetics* **36**:725–731.  
838 doi:10.1038/ng1375
- 839 Nita DA, Mole SE, Minassian BA. 2016. Neuronal ceroid lipofuscinoses. *Epileptic Disorders* **18**:S73–S88.  
840 doi:10.1684/epd.2016.0844
- 841 Pitts MW, Hoffmann PR. 2018. Endoplasmic reticulum-resident selenoproteins as regulators of calcium  
842 signaling and homeostasis. *Cell Calcium* **70**:76–86. doi:10.1016/j.ceca.2017.05.001
- 843 Plain F, Howie J, Kennedy J, Brown E, Shattock MJ, Fraser NJ, Fuller W. 2020. Control of protein  
844 palmitoylation by regulating substrate recruitment to a zDHHC-protein acyltransferase.  
845 *Communications Biology* **3**:1–10. doi:10.1038/s42003-020-01145-3
- 846 Rana MS, Lee CJ, Banerjee A. 2018. The molecular mechanism of DHHC protein acyltransferases.  
847 *Biochemical Society Transactions* **47**:157–167. doi:10.1042/BST20180429
- 848 Raymond FL, Tarpey PS, Edkins S, Tofts C, O’Meara S, Teague J, Butler A, Stevens C, Barthorpe S, Buck G,  
849 Cole J, Dicks E, Gray K, Halliday K, Hills K, Hinton J, Jones D, Menzies A, Perry J, Raine K, Shepherd R,  
850 Small A, Varian J, Widaa S, Mallya U, Moon J, Luo Y, Shaw M, Boyle J, Kerr B, Turner G, Quarrell O,  
851 Cole T, Easton DF, Wooster R, Bobrow M, Schwartz CE, Gecz J, Stratton MR, Futreal PA. 2007.  
852 Mutations in ZDHHC9, Which Encodes a Palmitoyltransferase of NRAS and HRAS, Cause X-Linked  
853 Mental Retardation Associated with a Marfanoid Habitus. *The American Journal of Human Genetics*  
854 **80**:982–987. doi:10.1086/513609
- 855 Roberts MS, Macauley SL, Wong AM, Yilmaz D, Hohm S, Cooper JD, Sands MS. 2012. Combination small  
856 molecule PPT1 mimetic and CNS-directed gene therapy as a treatment for infantile neuronal ceroid  
857 lipofuscinosis. *Journal of Inherited Metabolic Disease* **35**:847–857. doi:10.1007/s10545-011-9446-x
- 858 Rocks O, Gerauer M, Vartak N, Koch S, Huang ZP, Pechlivanis M, Kuhlmann J, Brunsveld L, Chandra A,  
859 Ellinger B, Waldmann H, Bastiaens PIH. 2010. The palmitoylation machinery is a spatially organizing  
860 system for peripheral membrane proteins. *Cell* **141**:458–471. doi:10.1016/j.cell.2010.04.007
- 861 Rodenburg RNP, Snijder J, Van De Waterbeemd M, Schouten A, Granneman J, Heck AJR, Gros P. 2017.

- 862 Stochastic palmitoylation of accessible cysteines in membrane proteins revealed by native mass  
863 spectrometry. *Nature Communications* **8**:1–9. doi:10.1038/s41467-017-01461-z
- 864 Rosenberg AB, Roco CM, Muscat RA, Kuchina A, Sample P, Yao Z, Graybuck LT, Peeler DJ, Mukherjee S,  
865 Chen W, Pun SH, Sellers DL, Tasic B, Seelig G. 2018. Single-cell profiling of the developing mouse  
866 brain and spinal cord with split-pool barcoding. *Science* **360**:176–182.  
867 doi:10.1126/science.aam8999
- 868 Salaun C, Locatelli C, Zmuda F, González JC, Chamberlain LH. 2020. Accessory proteins of the zDHHC  
869 family of S-acylation enzymes. *Journal of Cell Science* **133**. doi:10.1242/jcs.251819
- 870 Sanders SS, Martin DDO, Butland SL, Lavallée-Adam M, Calzolari D, Kay C, Yates JR, Hayden MR. 2015.  
871 Curation of the Mammalian Palmitoylome Indicates a Pivotal Role for Palmitoylation in Diseases  
872 and Disorders of the Nervous System and Cancers. *PLoS Computational Biology* **11**:e1004405.  
873 doi:10.1371/journal.pcbi.1004405
- 874 Saunders A, Macosko EZ, Wysoker A, Goldman M, Krienen FM, de Rivera H, Bien E, Baum M, Bortolin L,  
875 Wang S, Goeva A, Nemesh J, Kamitaki N, Brumbaugh S, Kulp D, McCarroll SA. 2018. Molecular  
876 Diversity and Specializations among the Cells of the Adult Mouse Brain. *Cell* **174**:1015-1030.e16.  
877 doi:10.1016/j.cell.2018.07.028
- 878 Schneider A, Länder H, Schulz G, Wolburg H, Nave K-A, Schulz JB, Simons M. 2005. Palmitoylation is a  
879 sorting determinant for transport to the myelin membrane. *Journal of cell science* **118**:2415–23.  
880 doi:10.1242/jcs.02365
- 881 Schwarz F, Aebi M. 2011. Mechanisms and principles of N-linked protein glycosylation. *Current Opinion*  
882 *in Structural Biology* **21**:576–582. doi:10.1016/j.sbi.2011.08.005
- 883 Shimell JJ, Shah BS, Cain SM, Thouta S, Kuhlmann N, Tatarnikov I, Jovellar DB, Brigidi GS, Kass J,  
884 Milnerwood AJ, Snutch TP, Bamji SX. 2019. The X-Linked Intellectual Disability Gene *Zdhhc9* Is  
885 Essential for Dendrite Outgrowth and Inhibitory Synapse Formation. *Cell Reports* **29**:2422-2437.e8.  
886 doi:10.1016/j.celrep.2019.10.065
- 887 Shyng C, Nelvagal HR, Dearborn JT, Tyynelä J, Schmidt RE, Sands MS, Cooper JD. 2017. Synergistic effects  
888 of treating the spinal cord and brain in CLN1 disease. *Proceedings of the National Academy of*  
889 *Sciences of the United States of America* **114**:E5920–E5929. doi:10.1073/pnas.1701832114

- 890 Sjöstedt E, Zhong W, Fagerberg L, Karlsson M, Mitsios N, Adori C, Oksvold P, Edfors F, Limiszewska A,  
891 Hikmet F, Huang J, Du Y, Lin L, Dong Z, Yang L, Liu X, Jiang H, Xu X, Wang J, Yang H, Bolund L,  
892 Mardinoglu A, Zhang C, von Feilitzen K, Lindskog C, Pontén F, Luo Y, Hökfelt T, Uhlén M, Mulder J.  
893 2020. An atlas of the protein-coding genes in the human, pig, and mouse brain. *Science*  
894 **367**:eaay5947. doi:10.1126/science.aay5947
- 895 Solis GP, Valnohova J, Alvarez C, Katanaev VL. 2020. Local and substrate-specific S-palmitoylation  
896 determines subcellular localization of Gαo. *bioRxiv* 2020.08.25.266692.  
897 doi:10.1101/2020.08.25.266692
- 898 Swarthout JT, Lobo S, Farh L, Croke MR, Greentree WK, Deschenes RJ, Linder ME. 2005. DHHC9 and  
899 GCP16 constitute a human protein fatty acyltransferase with specificity for H- and N-Ras. *Journal of*  
900 *Biological Chemistry* **280**:31141–31148. doi:10.1074/jbc.M504113200
- 901 Szklarczyk D, Gable AL, Lyon D, Junge A, Wyder S, Huerta-Cepas J, Simonovic M, Doncheva NT, Morris JH,  
902 Bork P, Jensen LJ, Von Mering C. 2019. STRING v11: Protein-protein association networks with  
903 increased coverage, supporting functional discovery in genome-wide experimental datasets.  
904 *Nucleic Acids Research* **47**:D607–D613. doi:10.1093/nar/gky1131
- 905 Tasic B, Yao Z, Graybuck LT, Smith KA, Nguyen TN, Bertagnolli D, Goldy J, Garren E, Economo MN,  
906 Viswanathan S, Penn O, Bakken T, Menon V, Miller J, Fong O, Hirokawa KE, Lathia K, Rimorin C,  
907 Tieu M, Larsen R, Casper T, Barkan E, Kroll M, Parry S, Shapovalova N V., Hirschstein D, Pendergraft  
908 J, Sullivan HA, Kim TK, Szafer A, Dee N, Groblewski P, Wickersham I, Cetin A, Harris JA, Levi BP,  
909 Sunkin SM, Madisen L, Daigle TL, Looger L, Bernard A, Phillips J, Lein E, Hawrylycz M, Svoboda K,  
910 Jones AR, Koch C, Zeng H. 2018. Shared and distinct transcriptomic cell types across neocortical  
911 areas. *Nature* **563**:72–78. doi:10.1038/s41586-018-0654-5
- 912 Thomas GM, Hayashi T, Chiu SL, Chen CM, Huganir RL. 2012. Palmitoylation by DHHC5/8 Targets GRIP1  
913 to Dendritic Endosomes to Regulate AMPA-R Trafficking. *Neuron* **73**:482–496.  
914 doi:10.1016/j.neuron.2011.11.021
- 915 Thomas GM, Hayashi T, Huganir RL, Linden DJ. 2013. DHHC8-dependent PICK1 palmitoylation is required  
916 for induction of cerebellar long-term synaptic depression. *Journal of Neuroscience* **33**:15401–  
917 15407. doi:10.1523/JNEUROSCI.1283-13.2013
- 918 Tzschach A, Grasshoff U, Beck-Woedl S, Dufke C, Bauer C, Kehrer M, Evers C, Moog U, Oehl-Jaschkowitz

- 919 B, Donato N Di, Maiwald R, Jung C, Kuechler A, Schulz S, Meinecke P, Spranger S, Kohlhase J, Seidel  
920 J, Reif S, Rieger M, Riess A, Sturm M, Bickmann J, Schroeder C, Dufke A, Riess O, Bauer P. 2015.  
921 Next-generation sequencing in X-linked intellectual disability. *European Journal of Human Genetics*  
922 **23**:1513–1518. doi:10.1038/ejhg.2015.5
- 923 Ubersax JA, Ferrell JE. 2007. Mechanisms of specificity in protein phosphorylation. *Nature Reviews*  
924 *Molecular Cell Biology* **8**:530–541. doi:10.1038/nrm2203
- 925 Vartak N, Papke B, Grecco HE, Rossmannek L, Waldmann H, Hedberg C, Bastiaens PIH. 2014. The  
926 autodepalmitoylating activity of APT maintains the spatial organization of palmitoylated  
927 membrane proteins. *Biophysical Journal* **106**:93–105. doi:10.1016/j.bpj.2013.11.024
- 928 Verardi R, Kim JS, Ghirlando R, Banerjee A. 2017. Structural Basis for Substrate Recognition by the  
929 Ankyrin Repeat Domain of Human DHHC17 Palmitoyltransferase. *Structure* **25**:1337-1347.e6.  
930 doi:10.1016/j.str.2017.06.018
- 931 Virlogeux A, Scaramuzzino C, Lenoir S, Carpentier R, Louessard M, Genoux A, Lino P, Hinckelmann MV,  
932 Perrier AL, Humbert S, Saudou F. 2021. Increasing brain palmitoylation rescues behavior and  
933 neuropathology in Huntington disease mice. *Science Advances* **7**:799–830.  
934 doi:10.1126/sciadv.abb0799
- 935 Wagstyl K, Ronan L, Whitaker KJ, Goodyer IM, Roberts N, Crow TJ, Fletcher PC. 2016. Multiple markers  
936 of cortical morphology reveal evidence of supragranular thinning in schizophrenia. *Translational*  
937 *Psychiatry* **6**:780. doi:10.1038/tp.2016.43
- 938 Woodley KT, Collins MO. 2019. S-acylated Golga7b stabilises <sc>DHHC</sc> 5 at the plasma  
939 membrane to regulate cell adhesion. *EMBO reports* **20**:e47472. doi:10.15252/embr.201847472
- 940 Yanai A, Huang K, Kang R, Singaraja RR, Arstikaitis P, Gan L, Orban PC, Mullard A, Cowan CM, Raymond  
941 LA, Drisdell RC, Green WN, Ravikumar B, Rubinsztein DC, El-Husseini A, Hayden MR. 2006.  
942 Palmitoylation of huntingtin by HIP14 is essential for its trafficking and function. *Nature*  
943 *Neuroscience* **9**:824–831. doi:10.1038/nn1702
- 944 Yao Z, van Velthoven CTJ, Nguyen TN, Goldy J, Seden-Cortes AE, Baftizadeh F, Bertagnolli D, Casper T,  
945 Chiang M, Crichton K, Ding SL, Fong O, Garren E, Glandon A, Gouwens NW, Gray J, Graybuck LT,  
946 Hawrylycz MJ, Hirschstein D, Kroll M, Lathia K, Lee C, Levi B, McMillen D, Mok S, Pham T, Ren Q,  
947 Rimorin C, Shapovalova N, Sulc J, Sunkin SM, Tieu M, Torkelson A, Tung H, Ward K, Dee N, Smith



- 948 KA, Tasic B, Zeng H. 2021. A taxonomy of transcriptomic cell types across the isocortex and  
949 hippocampal formation. *Cell* **184**:3222-3241.e26. doi:10.1016/j.cell.2021.04.021
- 950 Yuan W, Lu L, Rao M, Huang Y, Liu CE, Liu S, Zhao Y, Liu H, Zhu J, Chao T, Wu C, Ren J, Lv L, Li W, Qi S,  
951 Liang Y, Yue S, Gao J, Zhang Z, Kong E. 2021. GFAP hyperpalmitoylation exacerbates astrogliosis and  
952 neurodegenerative pathology in PPT1-deficient mice. *Proceedings of the National Academy of  
953 Sciences of the United States of America* **118**. doi:10.1073/pnas.2022261118
- 954 Zareba-Koziol M, Bartkowiak-Kaczmarek A, Figiel I, Krzystyniak A, Wojtowicz T, Bijata M, Wlodarczyk J.  
955 2019. Stress-induced Changes in the S-palmitoylation and S-nitrosylation of Synaptic Proteins.  
956 *Molecular and Cellular Proteomics* **18**:1916–1938. doi:10.1074/mcp.RA119.001581
- 957 Zeisel A, Hochgerner H, Lönnerberg P, Johnsson A, Memic F, van der Zwan J, Häring M, Braun E, Borm LE,  
958 La Manno G, Codeluppi S, Furlan A, Lee K, Skene N, Harris KD, Hjerling-Leffler J, Arenas E, Ernfors P,  
959 Marklund U, Linnarsson S. 2018. Molecular Architecture of the Mouse Nervous System. *Cell*  
960 **174**:999-1014.e22. doi:10.1016/j.cell.2018.06.021
- 961 Zeisel A, Moz-Manchado AB, Codeluppi S, Lönnerberg P, Manno G La, Juréus A, Marques S, Munguba H,  
962 He L, Betsholtz C, Rolny C, Castelo-Branco G, Hjerling-Leffler J, Linnarsson S. 2015. Cell types in the  
963 mouse cortex and hippocampus revealed by single-cell RNA-seq. *Science* **347**:1138–1142.  
964 doi:10.1126/science.aaa1934
- 965

**Figure 1**

**A.**

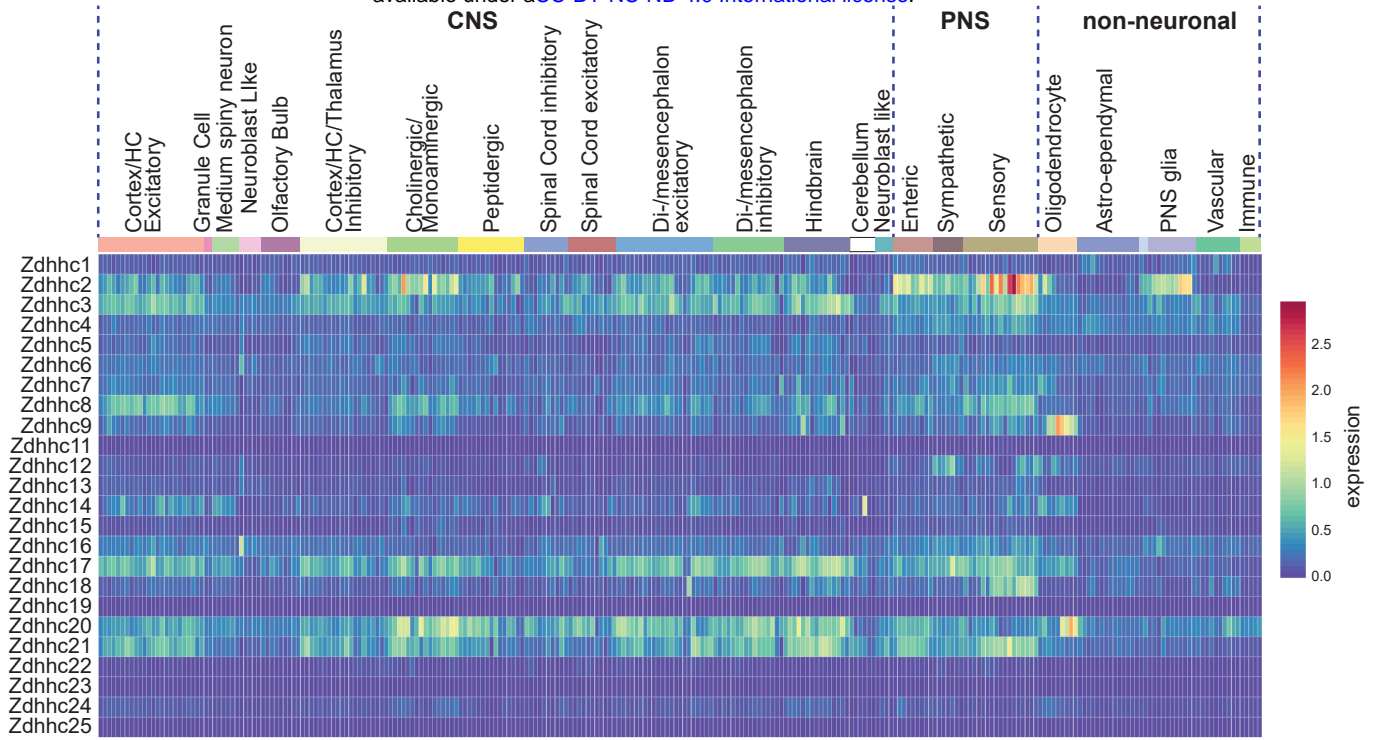

**B.**

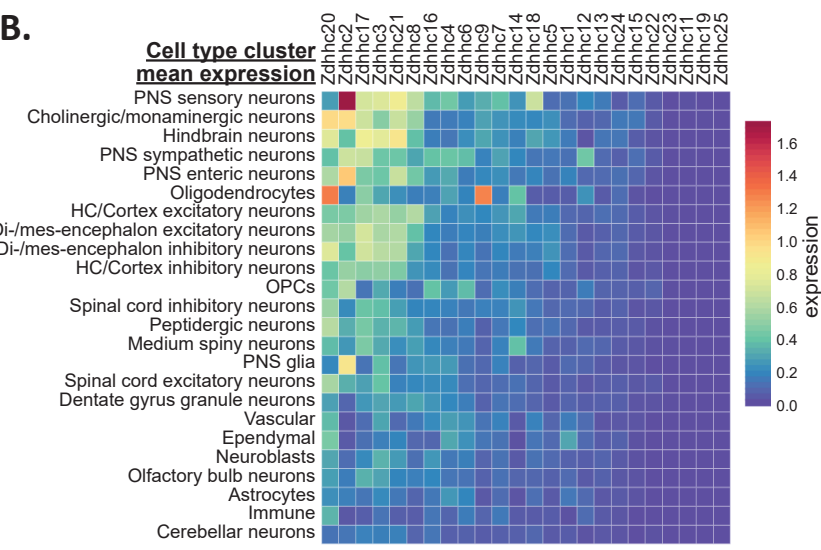

**C.**

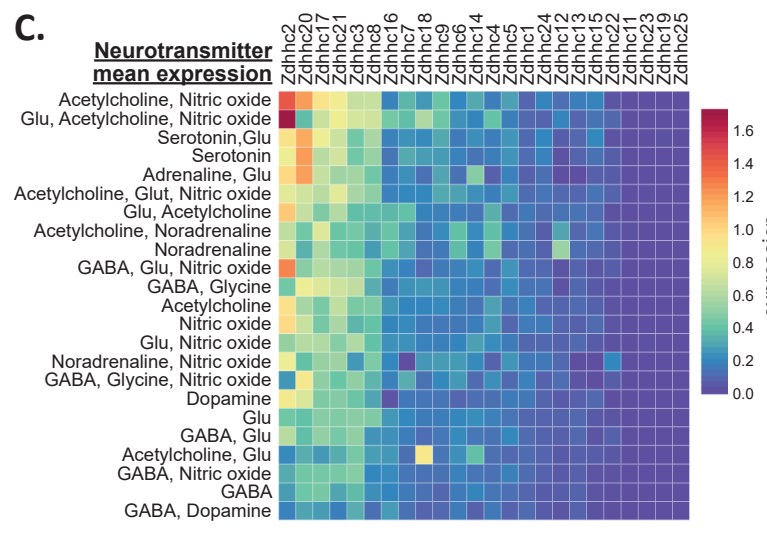

**D.**

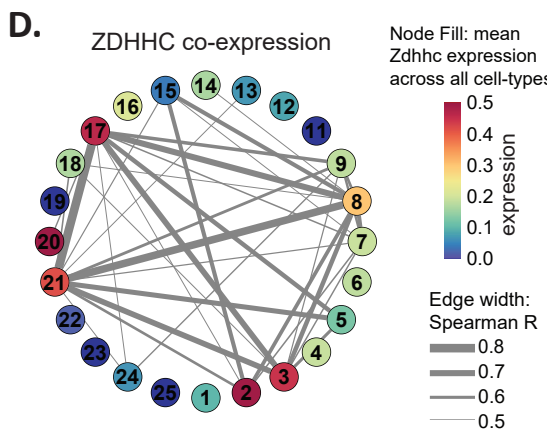

**E.**

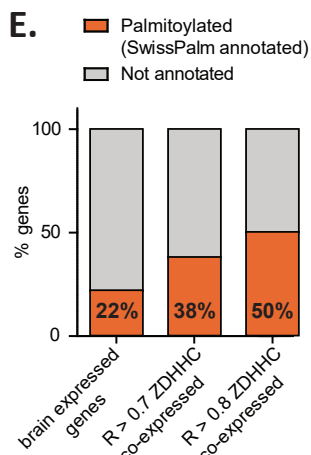

**F.**

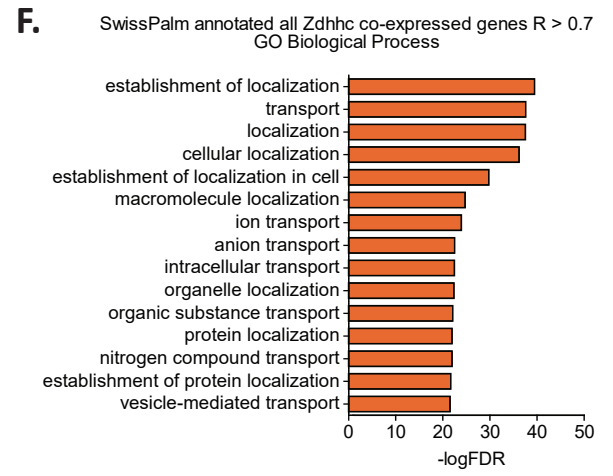

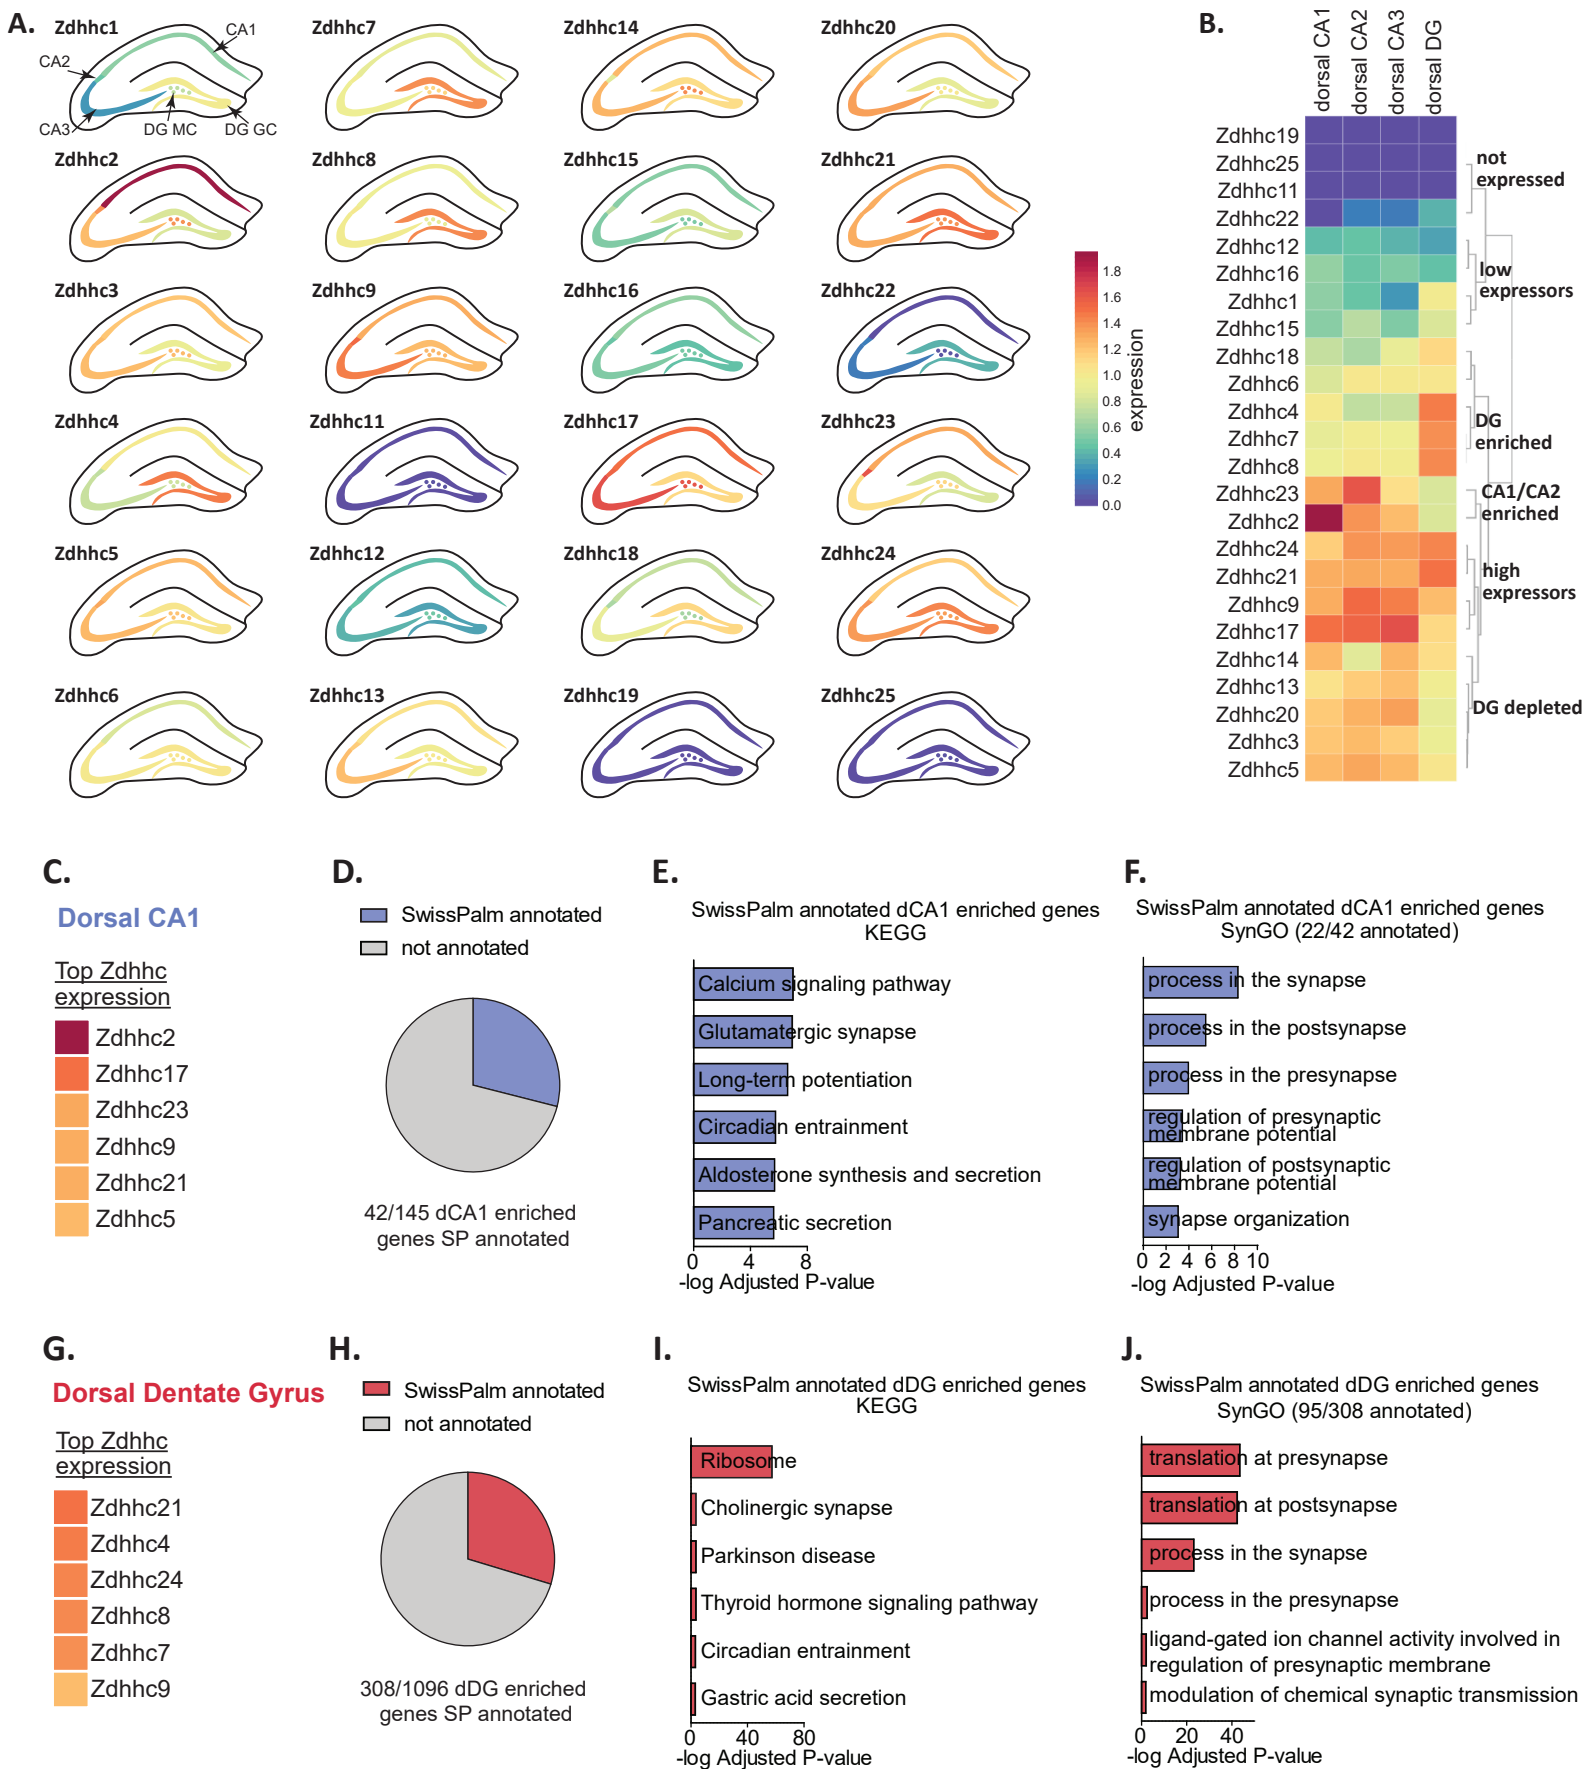

A.

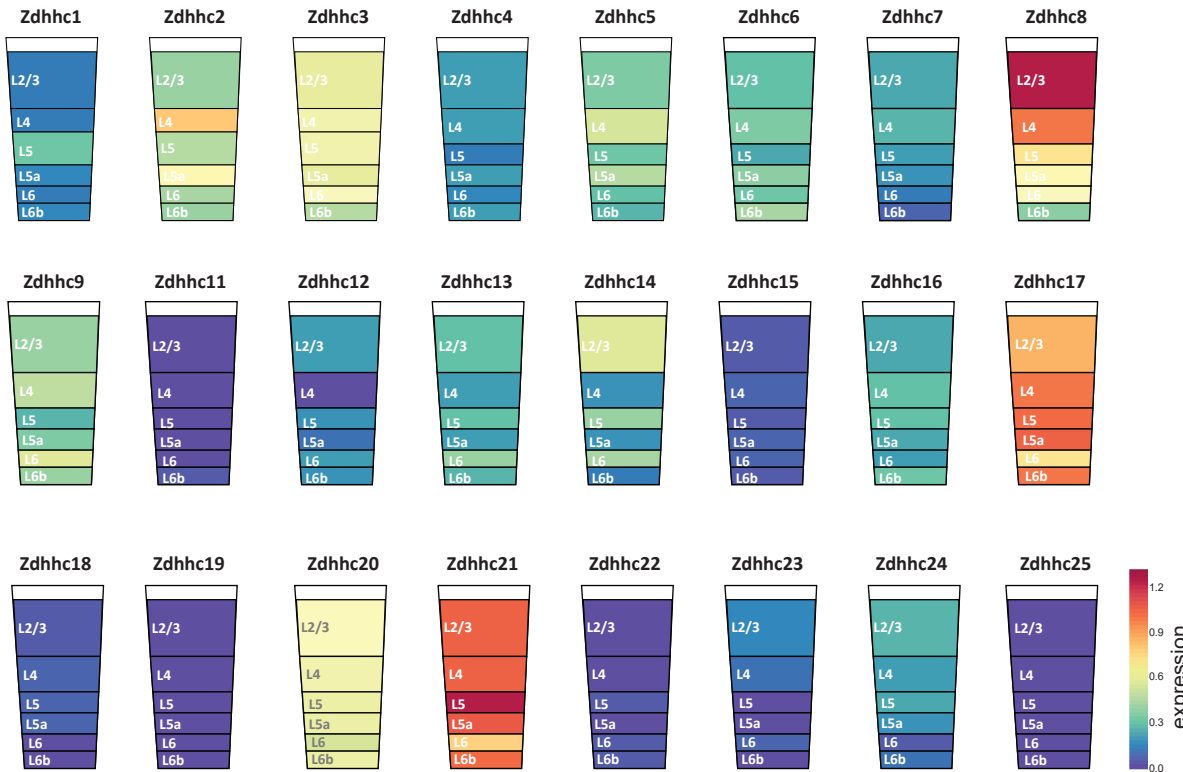

B.

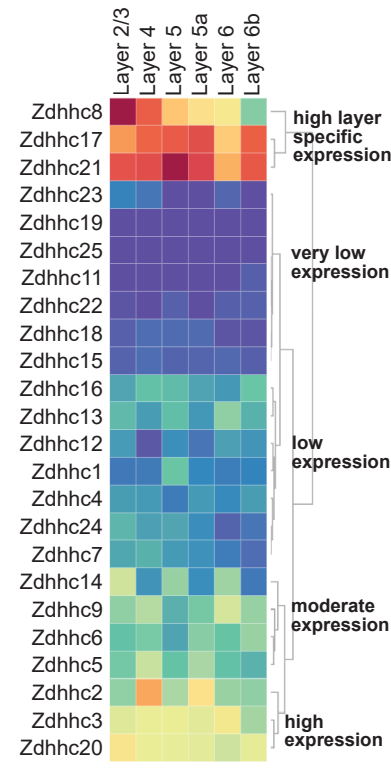

C.

Allen Brain 10X glutamatergic neurons

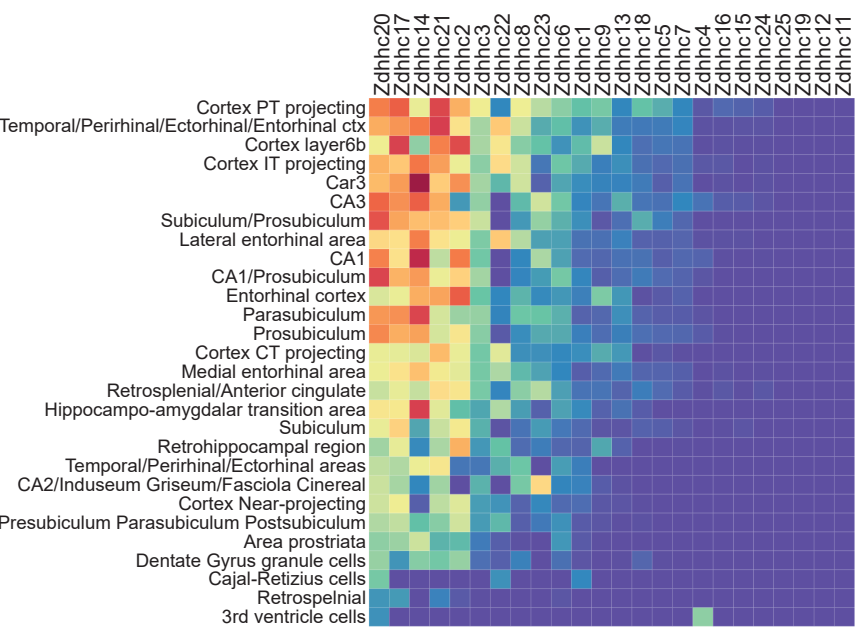

D.

Allen Brain 10X GABAergic neurons

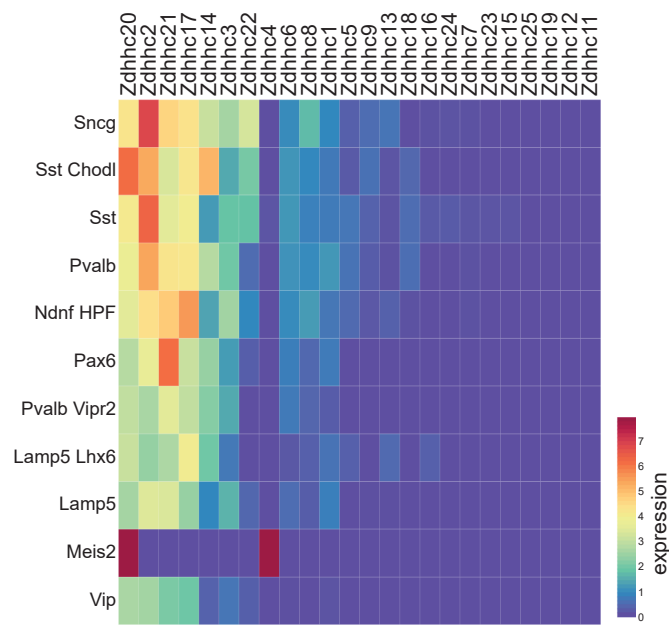

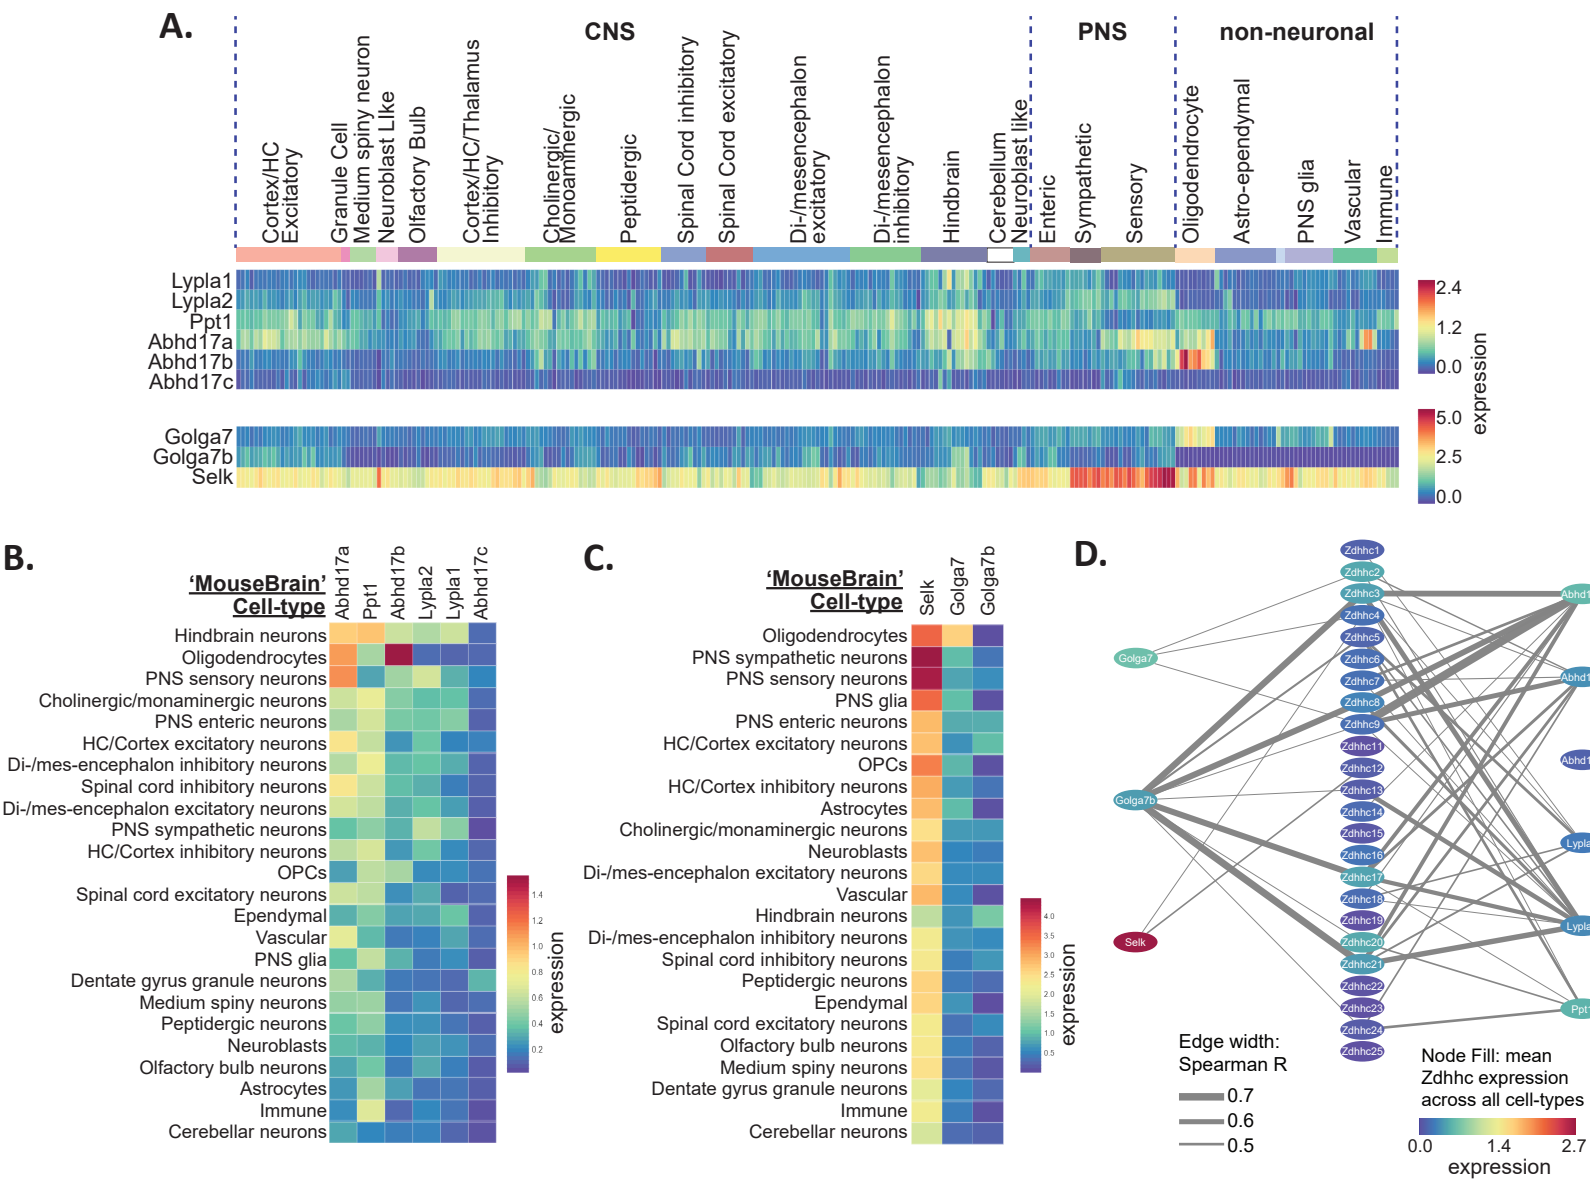

Figure 5

**A. *Zdhhc8* neonatal expression**  
Rosenberg et al <P11

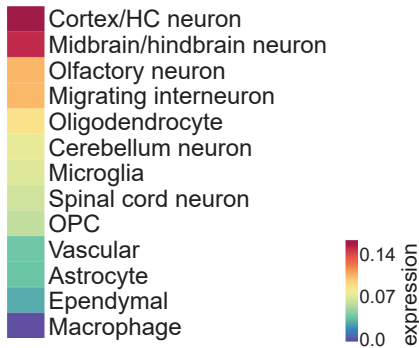

**B. *Zdhhc8* adolescent expression**  
'MouseBrain' P25

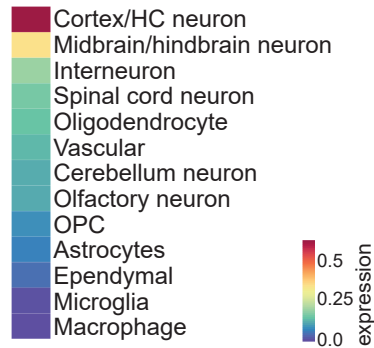

**C. *Zdhhc8* adult expression**  
'Protein Atlas' Mouse P60

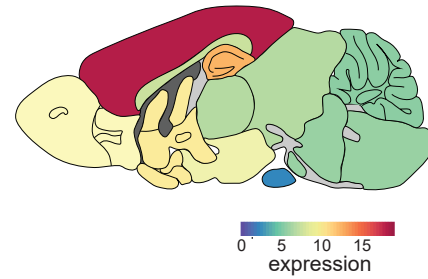

**D. *Zdhhc9* neonatal expression**  
Rosenberg et al <P11

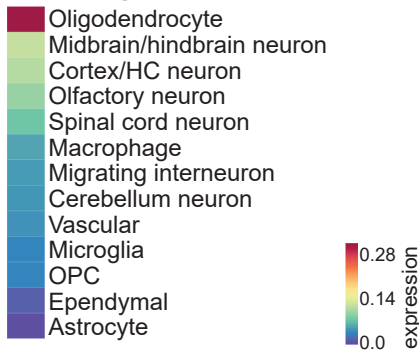

**E. *Zdhhc9* adolescent expression**  
'MouseBrain' P25

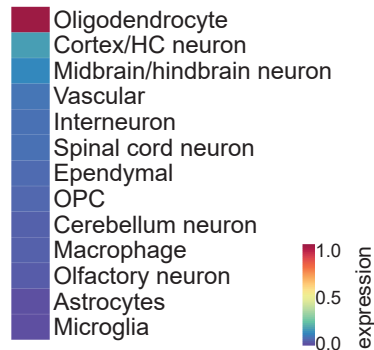

**F. *Zdhhc9* adult expression**  
'Protein Atlas' Mouse P60

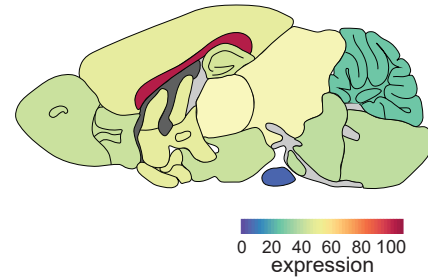

**G. *Ppt1* neonatal expression**  
Rosenberg et al <P11

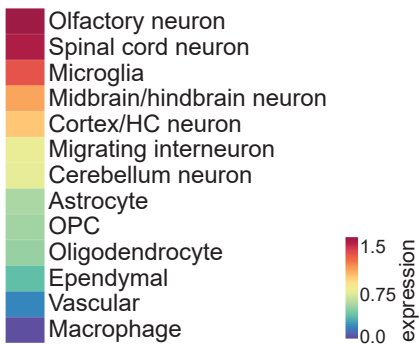

**H. *Ppt1* adolescent expression**  
'MouseBrain' P25

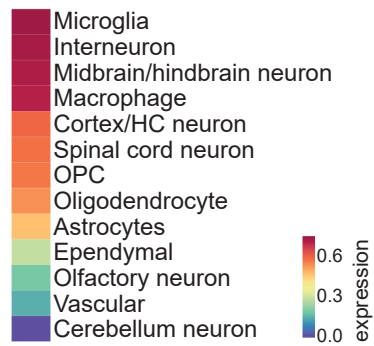

**I. *Ppt1* adult expression**  
'Protein Atlas' Mouse P60

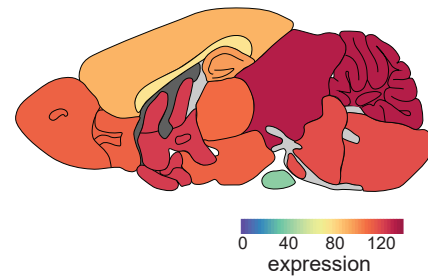

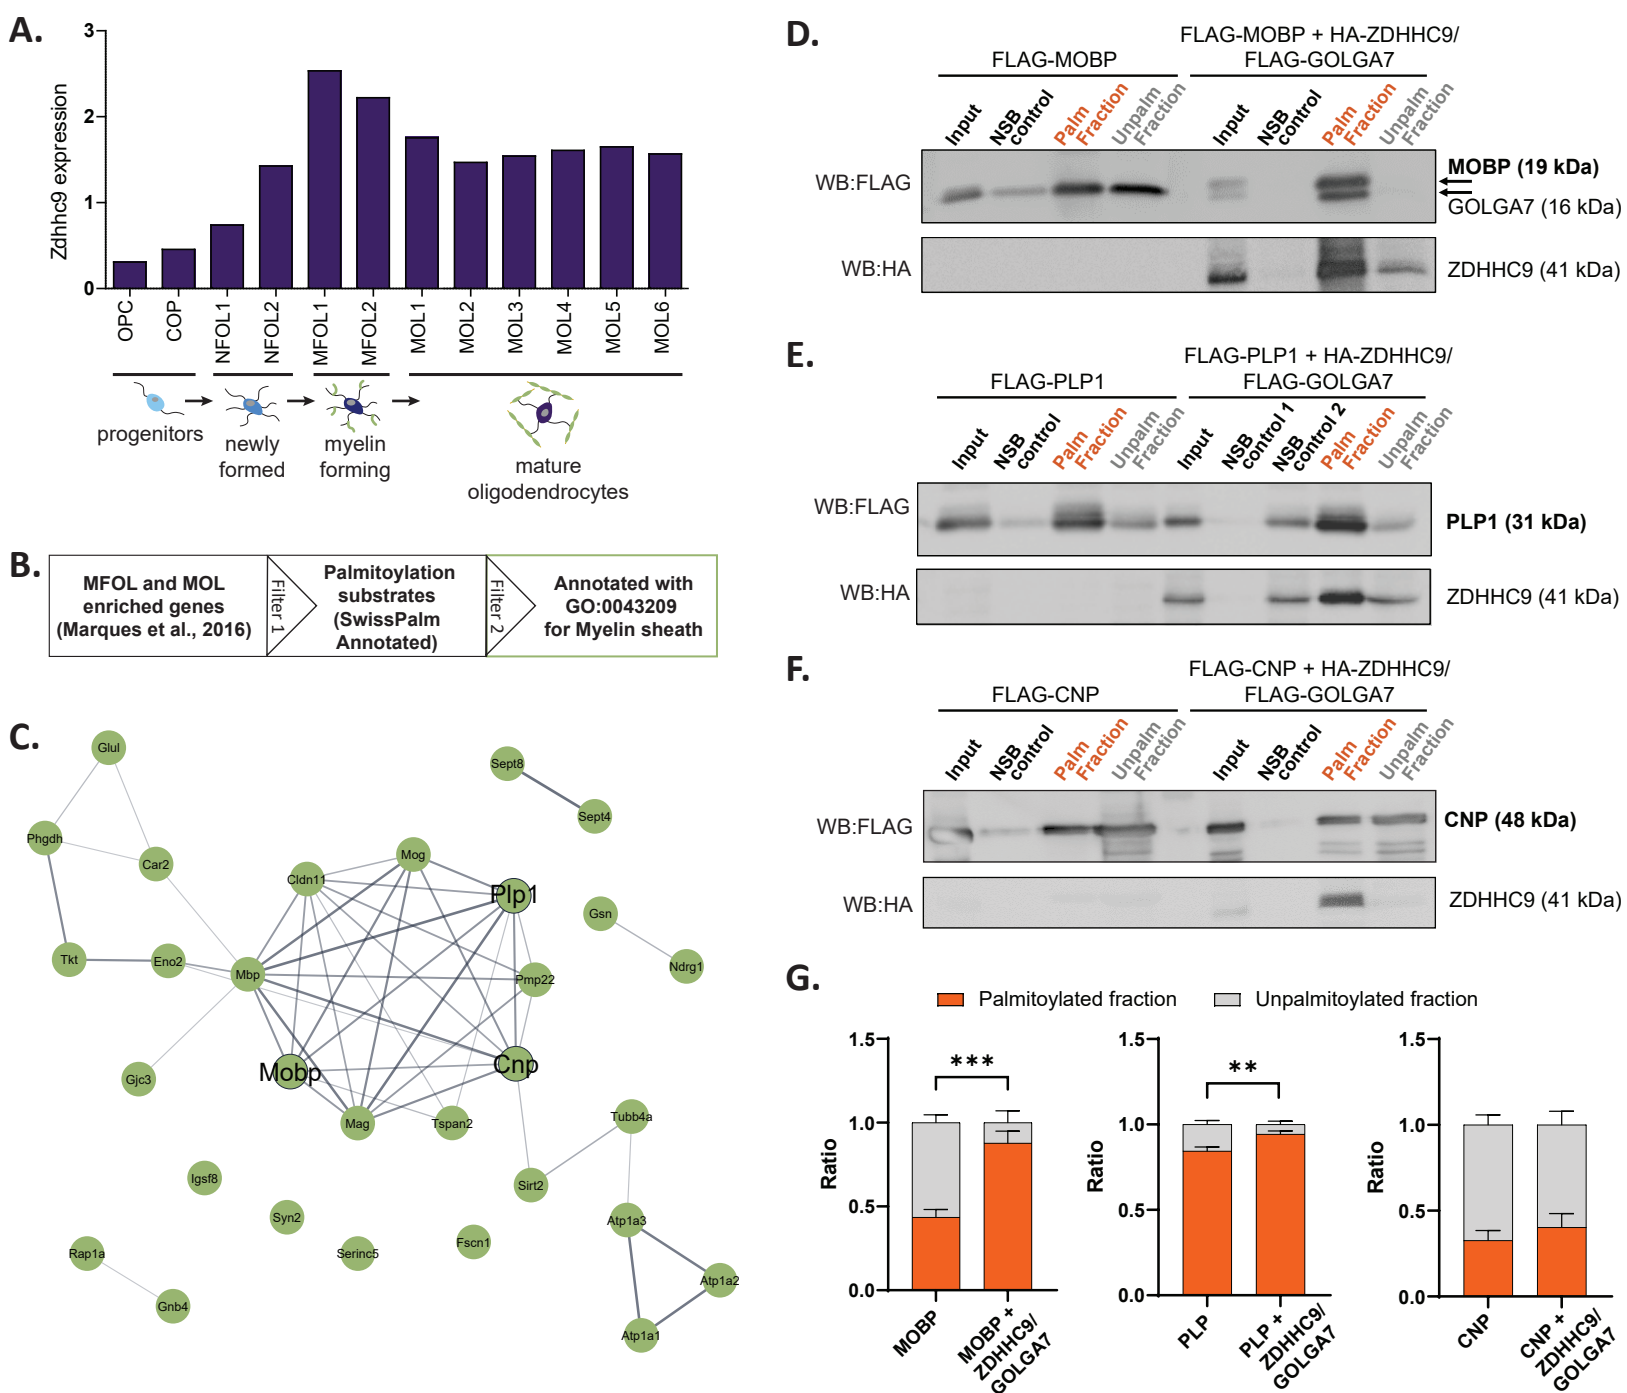

Source: http://biorxiv.org/content/10.1101/2021.11.23.468539v2.full.pdf
